# Supplementary material for: Relating sex-bias in human cortical and hippocampal microstructure to sex hormones
Source: PubMed Central journal article supplement (PMC11344136; doi:10.1038/s41467-024-51459-7), 2024-08-23
Supplement: 41467_2024_51459_MOESM2_ESM.pdf [file 41467_2024_51459_MOESM2_ESM.pdf]

### Relating sex-bias in human cortical and hippocampal microstructure to sex hormones

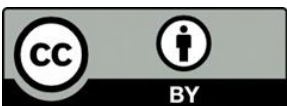

**Open Access** This file is licensed under a Creative Commons Attribution 4.0 International License, which permits use, sharing, adaptation, distribution and reproduction in any medium or format, as long as you give appropriate credit to the original author(s) and the source, provide a link to the Creative Commons license, and indicate if changes were made. In the cases where the authors are anonymous, such as is the case for the reports of anonymous peer reviewers, author attribution should be to 'Anonymous Referee' followed by a clear attribution to the source work. The images or other third party material in this file are included in the article's Creative Commons license, unless indicated otherwise in a credit line to the material. If material is not included in the article's Creative Commons license and your intended use is not permitted by statutory regulation or exceeds the permitted use, you will need to obtain permission directly from the copyright holder. To view a copy of this license, visit <http://creativecommons.org/licenses/by/4.0/>.

Reviewer #1 (Remarks to the Author):

Thank you for the opportunity to review "Relating sex differences in cortical and hippocampal microstructure to sex hormones" by Küchenhoff and colleagues. The manuscript describes sex differences in three metrics (profile mean, skewness and gradients) derived from T1w/T2w and their associations with hormonal profiles, transcriptomic maps of sex hormone related genes, and cytoarchitectural structure in the brain using the HCP dataset. The manuscript has several strengths including great clarity in its writing style, use of cutting edge methods, integration of information for different modalities of brain measurement, careful attention to that sex differences do and don't mean, and excellent use to control and sensitivity analyses. Overall, this is an important and well-executed study that highlights the importance of taking sex hormone into consideration when investigating brain structure and plasticity.

Nevertheless, there are some key points that would be good to address in revision.

Major comments:

(1) Lines 79-81, the authors argue that using T1w/T2w could yield a more nuanced characterization of sex differences free from biases due to insufficient control of systematic sex differences in brain size. This reasoning assumes that regional microstructure is independent from brain size – which is not the case (e.g. Warling, McDermott, et al, *Jnl Neuroscience*, 2021). The authors do in fact end up controlling for brain size in their analyses despite this initial statement regarding the attraction of microstructural measures for being independent of brain size. It would be good to do the following and show results in Supplementary Materials : (i) their models already include brain size, so please show the cortical and subcortical maps of eTIV relationship with each microstructural measure; (ii) show maps of the sex effect without controlling for brain size . Depending on the outcome of these two, the authors may need to modify their statement in lines 79-81.

(2) Why did the authors choose to use a purely fMRI derived parcellation (Schaffer) when looking at structural dependent variables? It would be good to justify this and/or switch to e.g. Glasser parcellation (which incorporates microstructural information) – either instead of Schaffer, or as supplement to show parcellation independence for key effects.

(3) The direction of mean and skew sex differences in T1w/T2w profile is opposite. Is it the case within each sex that having a higher mean value is associated with a lower skew? That is - does the coordination of sex differences in mean and skew values cohere with the coordination of these two properties across individuals? The answer to this question (in either direction) would be highly informative and helpful for interpretation of findings.

(4) In lines 192-194, the authors state that "We repeated all analyses additionally controlling cortical thickness as well as for family structure to account for potential confounds of twins in the dataset. Neither changed the original results (supplement 1)". This is good to know, but a complementary and equally important question whether the spatial patterning of sex effects on microstructure related to the spatial patterning of sex effects on thickness? This is biologically important as it speaks to the spatial congruence or not of sex effects on two intimately related metrics, but it is also methodologically important because sex effects on CT could potentially bias estimation of sex effects on T1/Tw metrics calculated between gray/white and pial surfaces.

(5) The section "Sex differences in intracortical microstructure vary as a function of approximated sex hormone concentration (Fig 3.)". Interpretation of the findings using different female subgroups would benefit from some additional analyses/visualizations. First, it would be good to see a scatterplot matrix where each cell has a scatterplot of ROIs effect sizes as points and the axes being contrasts of different female subgroups with males. Second, it would also be important to run these subgroup comparisons using independent subgroups of males so that you don't have coloring of the effects by a shared property of the male comparison group. Third, it would also be important to mention Sup Fig 4 results more in the main text here and use this to specify which regions are significant. In this Sup Fig, I think it would be clearer if visualizations simply used 3 block colors given these are post thresholding: white no sig effect and red/blue for sig

effects in each direction. Fourth, are the different effects seen for different female subgroups reflecting changes in the magnitude of the effects, or differences in interindividual variability between the different female subgroups? This would be important to clarify empirically. Fifth, it is striking that the OC group show preservation of the full group effect for mean T1/T2, but loss of the full group effect for skew. Moreover – the situation was not the same in the hippocampus. These are very challenging dissociations to explain biologically. What thoughts to the authors have? Finally, given the complexity of this results section, I would suggest providing readers a “mini-summary” with some key take aways at the end, around line 285.

(6) The section “Endocrine plasticity effects on intracortical structure spatially overlap with cortical expression patterns of sex hormone related genes (Figure 4)”. First, was correction made for multiple comparisons across genes and maps? Second, for most of genes examined, their spatial correlations with the three metrics did not reach statistical significance as it, i.e.,  $p_{spin} < 0.05$ . However, the authors describe these nonsignificant findings as in line 311, Strong overlap were additionally presented by the androgen receptor gene AR ( $r = -.31$ ,  $P_{spin} = .15$ ) and the progesterone receptor PGRMC1 ( $r = .26$ ,  $P_{spin} = .20$ ), and using them as support (line 536 to 538) to draw a conclusion, strongly overlapped with sex hormone gene expression levels (line 624). This should be reworded. Third, there is insufficient attention given - in analytic design, presentation of results and discussion of results - to the fact that the AHBA dataset contains only one female. Therefore, all the expression maps examined are predominantly from the 5 male donors. Analytically, it would be important to provide some evidence that the reported connections between imaging and transcriptomics are at least trending in the same direction when expression maps are based on the single female donor. It is also important to say much more in Discussion and Limitations regarding the problem of sex imbalance in AHBA and what it means the authors can and can't say regarding their results. Finally, the corresponding Discussion section title should be changed to “Transcriptomics” decoding rather than “Genetic decoding”. The authors are not looking at genetic variation.

(7) Sections comparing sex difference to cytoarchitecture and cerebral blood flow. The question of multiple comparisons comes up here too. Also, the authors discuss similar correlations with some inconsistency. For example in the section starting on line 336, the authors state Sex differences differ in strength as a function of cytoarchitectural type (Figure 5), show that A positive correlation between T1w/T2w profile skewness ( $r = .20$ ,  $P_{spin} < .05$ ) and cortical types (line 348) and sex difference effects in the microstructural gradient showed moderate overlap with the hierarchy of cortical types ( $r = .14$ ,  $P_{spin} < 0.05$ ). Then on the section starting in line 367 the authors find some similarly sized correlations with maps of cerebral vasculature. However, these similar correlations are interpreted in different ways in the Discussion section, where the relationship with cytoarchitecture is treated a positive finding, whereas the vasculature correlations are downplayed. For example: we provide evidence that the observed effect was not confounded with hormone-induced fluctuations in cerebrovascular blood flow (line 412), The moderate overlap mean T1w/T2w effects with cerebral vein density furthermore (line 430), and Adding to this, we found that this measure was not affected by vasculature (line 625). It would be important to address such imbalances in interpretation.

(8) Discussion. Line 420 “The male cortex was characterized by ...” This suggests a typology (which the authors carefully push back against themselves in authors note) so should be reworded.

Minor Comments:

(1) Line 246, should cortex-wide average  $d_{high}$  estr female-male =  $-0.12846$  be  $d_{high}$  progesterone female-male?

(2) Line 250, We found that sex differences in the cingulate cortex, the insula, the orbitofrontal cortex and the hippocampus were most affected by the menstrual cycle phase and exogenous sex hormone intake (Figure 3C). It is hard to see these regional differences from three comparisons side-by-side in Figure 3C. Just a suggestion, running a separate anova model in females alone, a F test map of group effect in either all five subgroups or the three groups in Figure 3C (taking OC,

low estrogen, and high progesterone) across 400 parcels may help to illustrate region variations in the menstrual cycle phase.

(3) The display of labels in Supplemental Figure 4 seems off, like FDR corr. Cohens d for contrast Men vs high estr, fo.

(4) In Supplemental Table 5, it is surprising to see  $P_{spin} < P$  for spatial correlations between gene expression and sex differences in three metrics. I would expect spin tests are more stringent, yielding larger  $P_{spin}$  values.

(5) Line 372, We found that sex-differencers should be sex-differences.

(6) Line 428. Typo "the combination molecules".

(7) Line 430. Typo "moderate overlap mean T1w/T2w effects"

(8) Line 524 - should be "large" rather than "big"

#### Reviewer #2 (Remarks to the Author):

This article analyzes the cross-sectional MRI images of 992 young subjects from the Human Connectome Project. It calculates regional variation in cortical microstructure based on the T1/T2 ratio and analyzes how these metrics differ based on sex and menstrual phase (using self-reported days since menstruation). The authors also assess the spatial correspondence of MRI-derived maps with ex-vivo maps of sex hormone receptor gene expression. Although the results are very interesting, we have the following concerns:

The most important concern is that, although the authors state in the discussion that "It is important to note that instead of longitudinally following microstructural changes associated with hormonal variations within individuals, we computed inter-individual contrasts based on an indirectly approximated correlative hormonal measure. Therefore, we interpret our results as tendencies that highlight the importance of considering the complexity of hormones in the study of brain structure. However, due to our large sample size and a second, independent hormonal analysis, our results emphasize the importance of moving beyond a generalized understanding of sex differences and considering hormonal profiles as a crucial factor in interpreting and explaining these differences", the abstract and the paper are full of terms such as "influence of sex hormones (conclusion)" or "endocrine neuroplasticity". This can lead to an over-interpretation of the results. We suggest that the abstract and conclusion clearly reflect the cross-sectional nature of the MRI data and the absence of hormonal measures, and avoid terms such as "influence of sex hormones", "endocrine plasticity", etc., when discussing their own data.

#### Introduction:

We believe that the writing of the paper would benefit from narrowing and focusing the introduction, especially if this article is intended to be directed to the readers of a broad-scope journal such as Nature Communications. Along the same line, we believe that the introduction would benefit if the authors explain the biological interpretation of the extracted brain metrics to make it more accessible to a non-expert scientific audience.

#### Methods:

We recommend authors to include the Freesurfer-derived Euler Number as an additional covariate in the models, along with intracranial volume, age, and sex, to control for motion-related data quality.

We believe that authors should provide a clearer description of how they categorize the groups of interest, specifically females and males. The authors explain the criteria for classifying the female category (self-reported as females and being or having been menstruating), but they do not specify how they classify males. We assume that the male categorization follows the same logic as the female category (self-reported as males and not menstruating), leaving outside other categories (self-reported as females and not menstruating or self-reported as males and being or having been menstruating), but this should be explicitly stated. Also, authors sometimes mix the terms sex (female/male/intersex) and gender (women/men/other genders). For instance, when they define the female category, they state, "We classified individuals of female sex if they self-

reported their gender as female and indicated that they are or have been menstruating in their lives." We believe that a more appropriate definition should be: "We classified individuals of female sex if they self-reported their sex as female and indicated that they are or have been menstruating in their lives." Authors should homogenize the use of the terms males/females vs men/women throughout the manuscript. We suggest sticking to the male/female categories since this article focuses on sex-specific factors rather than gender.

If we understand correctly, the authors are parcellating the cortex into 12 sections. However, this parcellation is based on the information provided by approximately 4 voxels (as estimated by the voxel size of HCP images and the mean cortical thickness). We assume that the authors might have interpolated some of the values. In the same line, is the number of voxels different depending on the orientation of the perpendicular line used to calculate the layers? How does this might affect the calculated metrics, especially the skewness?

#### Discussion:

One strong point of the article is that it detects sex differences in brain structure when grouping individuals into the female-male categories. However, when dividing females into the five subgroup categories, these sex differences only replicate in the OC users. We believe this should be further discussed and treated as one of the main results of the article, especially since the authors disclose at some points that studies that merely test sex differences are over-simplistic and that considering sex-specific factors such as hormonal levels is essential.

#### Reviewer #3 (Remarks to the Author):

The authors interrogated microstructural differences in the context of sex and menstrual cycle phase on three distinct levels, providing a novel account of sex-specific cytoarchitectural profiles in the brain. I am excited by this work, beautifully executed, and offer several insights that may improve its impact.

1. Given the age distribution of the sample (22-37), I wonder if the authors considered potential influences of perimenopause (I have seen females of their mid to late 30s in this stage before, though rare) and/or possible endocrine conditions (e.g., PCOS, history of hysterectomy, etc) that may have impacted hormonal levels. It would be important to at least report the lack of this information for the sake of transparency on potential heterogeneity of the sample, in terms of female hormone concentrations.

2. On a similar note, it would be useful to clarify the criterion of those that "are or have been menstruating in their lives" - Was this explicit to those currently menstruating at the time of the study on a regular basis, or could some females who have not menstruated for months or years on end, but at some point in their lives (as suggested by this criterion), have been included? If so, that could certainly skew the hormonal distribution of the sample.

3. Regarding the inclusion of a subset of females using OC - More details regarding the type of birth control (estrogen only, progesterone only, or combination), the length of exposure (being mindful of any who have recently started OC and may, therefore, still be adjusting), and the like is needed, considering that these variables play a significant role in the efficacy of OC. I would also encourage the authors to be as explicit as possible when discussing past literature about the effects of OC - For instance, lines 69-71 on page 3 could use more detail (i.e., type of OC, length of OC exposure, age and menopausal status of the sample). In sum, what is meant by "regular" OC?

4. It would also be beneficial to expand on the cross-sectional limitations of this study as baseline hormone levels were not acquired from females. Though there is a "usual range" which we might expect reproductive females to fall within in terms of hormone levels at each menstrual stage, what is "normal" for these instances can vary across individuals. Though cross-sectional work is still very informative, a thorough acknowledgement of this limitation, especially in the context of

this study, is lacking.

5. Was the time of day held consistent across subjects when collecting hormone information? Were hormones also measured in the males? I wonder if diurnal testosterone fluctuations in males might have an influence on the current results.

6. Relatedly, were the hormonal assessments, MRI, and menstrual questions completed within the same day? Or could a few females have transitioned to a different menstrual phase over the course of data collection?

7. I also wonder if comparisons within females, between the various stage-associated subgroups, might be useful to further interpret the results presented here. If no variations between female groups are found, this may be attributed to the over-generalization of hormone levels by stage rather than on an individual or change-from-baseline degree. If variations are found, however, this could corroborate the authors' grouping approach.

8. Regarding the results showing differences between males and high progesterone females, I would be interested to see a more in-depth interpretation from the authors to offer potential explanations for this specific finding.

9. In general, I would also encourage the authors to take a more careful approach with their discussion of results. The female subgroups may be a bit over-simplified, especially considering the moderate presence of estrogen in what the authors refer to as only the "high progesterone" stage. I am very pleased to see a paper that covers this topic, but am eager to see more unique conclusions that pose important questions while also being mindful of limitations. There is more room for discussion in this manner.

Thank you to the authors for taking on this work. I look forward to seeing it published.

Reviewer #4 (Remarks to the Author):

I co-reviewed this manuscript with one of the reviewers who provided the listed reports as part of the Nature Communications initiative to facilitate training in peer review and appropriate recognition for co-reviewers.

1 **Response to Reviewers (NCOMMS-23-52974) - Reviewer 1**

2  
3 We would like to thank the Editors and Reviewers for their positive evaluations, constructive  
4 comments, and for the opportunity to submit a revised manuscript. We feel that the comments and  
5 suggestions have greatly improved our manuscript. In this covering letter, we outline the steps we  
6 took to address the suggestions of the Reviewers in a point-by-point fashion below and highlighted  
7 the corresponding changes in the manuscript in yellow , and marked additions to the manuscript in  
8 *italic*.

9  
10  
11 **REVIEWER COMMENTS**

12  
13 **Reviewer #1 (Remarks to the Author):**

14  
15 **Thank you for the opportunity to review “Relating sex differences in cortical and hippocampal**  
16 **microstructure to sex hormones” by Küchenhoff and colleagues. The manuscript describes sex**  
17 **differences in three metrics (profile mean, skewness and gradients) derived from T1w/T2w and their**  
18 **associations with hormonal profiles, transcriptomic maps of sex hormone related genes, and**  
19 **cytoarchitectural structure in the brain using the HCP dataset. The manuscript has several strengths**  
20 **including great clarity in its writing style, use of cutting edge methods, integration of information**  
21 **for different modalities of brain measurement, careful attention to that sex differences do and don’t**  
22 **mean, and excellent use to control and sensitivity analyses. Overall, this is an important and well-**  
23 **executed study that highlights the importance of taking sex hormone into consideration when**  
24 **investigating brain structure and plasticity.**

25  
26 We thank the Reviewer for the appreciation of our work and the insightful comments, which we have  
27 addressed below.

28  
29 **Nevertheless, there are some key points that would be good to address in revision.**

30  
31 **Major comments:**

32  
33 **(1) Lines 79-81, the authors argue that using T1w/T2w could yield a more nuanced characterization**  
34 **of sex differences free from biases due to insufficient control of systematic sex differences in brain**

35 size. This reasoning assumes that regional microstructure is independent from brain size – which is  
36 not the case (e.g. Warling, McDermott, et al, Jnl Neuroscience, 2021). The authors do in fact end up  
37 controlling for brain size in their analyses despite this initial statement regarding the attraction of  
38 microstructural measures for being independent of brain size. It would be good to do the following  
39 and show results in Supplementary Materials : (i) their models already include brain size, so please  
40 show the cortical and subcortical maps of eTIV relationship with each microstructural measure;

41

42 We agree, and added the following text to the methods, and figure to the supplement.

43

44 **methods, p. 27b ll. 881:** *Since the microstructural measures exhibit small to moderate correlations*  
45 *with intracranial volume (ICV, see supplementary figure 10), in each model we accounted for ICV, as*  
46 *well as age and the euler number as a movement-related data quality measure: [...]*

47

48

49

#### T1w/T2w Mean

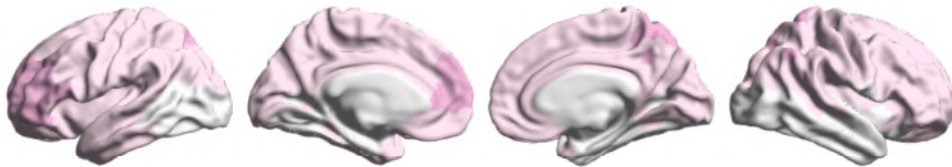

50

51

52

#### T1w/T2w Skewness

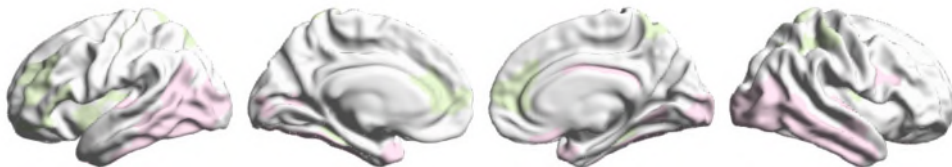

53

54

55

#### Microstructural Gradient

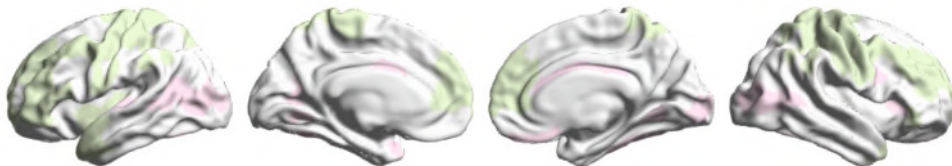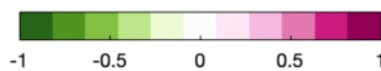

56

57

58

59

Pearson's r



60 **Supplementary Figure 10. Intracortical T1w/T2w signal intensity profiling, correlation with ICV.**  
61 *Parcel-wise correlation between ICV per subject and microstructural measures across the cortex. Pink*  
62 *reflect positive, green reflect negative correlations. No value is higher than  $r = .34$  for T1w/T2w mean,*  
63 *the peak value for T1w/T2w skewness is  $r = .21$ , and the highest correlation between ICV and a gradient*  
64 *parcel is  $-.21$ .*  
65

66 **(ii) show maps of the sex effect without controlling for brain size. Depending on the outcome of**  
67 **these two, the authors may need to modify their statement in lines 79-81.**

68

69 The authors thank the Reviewer for this comment. In fact, we feel the need to adjust the text to the  
70 following in order to avoid confusion about what T1w/T2w profiling can and cannot do (p.3, line 101  
71 note that we adjusted this section also according to comment 4):

72

73 *“[...] Together, these studies help to identify brain areas that are implicated in sex differences and*  
74 *influenced by sex hormones, however, they cannot show which microstructural features underpin these*  
75 *macro-level differences. In fact, morphometrical sex differences don’t necessarily overlap. For example,*  
76 *while males are characterized by overall higher gray matter volume, females have a generally higher*  
77 *gray matter density, and sex differences in cortical thickness are apparent in development, but become*  
78 *less pronounced in adulthood (Gennatas et al., 2017). Similarly, microstructural effects don’t seem to*  
79 *have a direct one-to-one match with macro-level anatomy. For example, quantitative brain-wide*  
80 *mapping of cell type distributions revealed lower cell density in volumetric larger brain regions in male*  
81 *mice in comparison to the female counterpart (Kim et al., 2017). There has not been a characterisation*  
82 *of human cortical microstructure sex differences in vivo, and it remains elusive if sex hormones might*  
83 *play a role in these variations. This study will thus aid in developing a more nuanced understanding of*  
84 *these anatomical variations. [...]”*

85

86 **(2) Why did the authors choose to use a purely fMRI derived parcellation (Schaefer) when looking at**  
87 **structural dependent variables? It would be good to justify this and/or switch to e.g. Glasser**  
88 **parcellation (which incorporates microstructural information) – either instead of Schaefer, or as sup**  
89 **mat to show parcellation independence for key effects.**

90

91 We thank the Reviewer for this remark. In previous work we have found little difference between  
92 Schaefer 400 and Glasser 360 parcellations for neuroanatomical studies (Valk, 2022). A potential  
93 benefit of the Schaefer parcellation scheme is that the parcels link to global and local functional  
94 profiles, and thus account for functional (re)organization, and have roughly equal size, whereas for  
95 the Glasser atlas primary areas are large and association areas smaller, creating a potential bias when

96 averaging anatomical values in this schema when not taking individualized parcellations. Nevertheless,  
97 we have now also ran the analyses using the Glasser parcellation and observed consistent results. We  
98 have added these findings to the Supplementary Materials for completeness.  
99

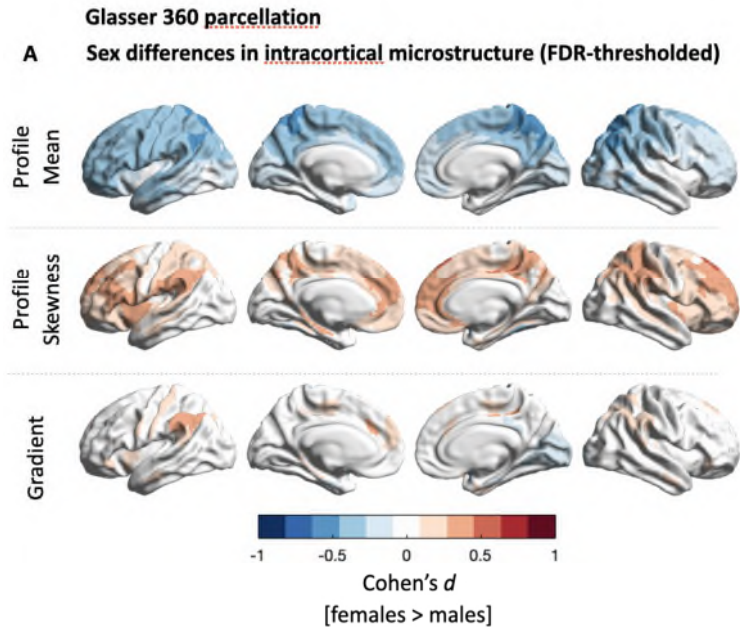

100 **Supplement 1. Intracortical T1w/T2w signal intensity profiling sex difference, Glasser 360**  
101 **parcellation.** Shown are Cohen's  $d$  values for the female > males contrast, controlling for family  
102 structure (including the interaction between twin status and family status), only coloring in parcels  
103 with a  $p$ -value lower than the FDR threshold.  
104  
105

106 *Results [addition, p.4 ll.135]*

107 *"We additionally demonstrate our results are not sensitive to other parcellations (Glasser, 2016;*  
108 *supplementary figure 1)."*

109

110

111 **(3) The direction of mean and skew sex differences in T1w/T2w profile is opposite. Is it the case**  
112 **within each sex that having a higher mean value is associated with a lower skew? That is - does the**  
113 **coordination of sex differences in mean and skew values cohere with the coordination of these two**  
114 **properties across individuals? The answer to this question (in either direction) would be highly**  
115 **informative and helpful for interpretation of findings.**

116

117 We agree with the Reviewer that this is an informative additional piece of information. We assessed  
118 the relation between mean and skewness in more detail and reached the conclusion that the relation  
119 is informative, but not big enough to make mean and skewness redundant. We thus add the following  
120 to the text and supplement:

121  
122  
123  
124  
125  
126  
127  
128  
129  
130  
131  
132  
133  
134  
135  
136  
137  
138  
139  
140  
141  
142

Results [addition, p. 6 ll.205 ]

“Cortex-wide patterns in mean and skewness sex differences showed a negative spatial correlation ( $r=-0.412$ ,  $p_{spin} < 0.01$ ). Further regional assessment of the association between mean and skewness showed that these measures showed particular negative relationships in higher association regions, whereas they have a positive relationship in anterior insula and mid/anterior cingulate and temporal pole (Supplementary Figure 2). This association, however, was mainly driven by females, where the average correlation between each parcel of baseline mean and skewness was  $r = -0.1156$ , while the average correlation between each parcel of baseline mean and skewness for males was  $-0.0451$ . This was mainly due to positive associations between mean and skewness in temporal and cingulate areas for males, but not females (Supplementary Figure 2).”

Discussion [addition, p.17, ll.532]

“Overall, the sex-difference effects in mean and skewness tend to be opposite, i.e. the T1w/T2w signal in females generally has a lower mean intensity than in males, and the signal intensity distribution within the cortex is less evenly. This does not mean, however, that the measure of mean and skewness are perfect opposites and therefore redundant. Rather, our results identify important regional differences in these measures that vary by sex, demonstrating the value for either measure. In fact, in our subsequent analyses, we find the measure of skewness to be most reliably related to sex hormones.”

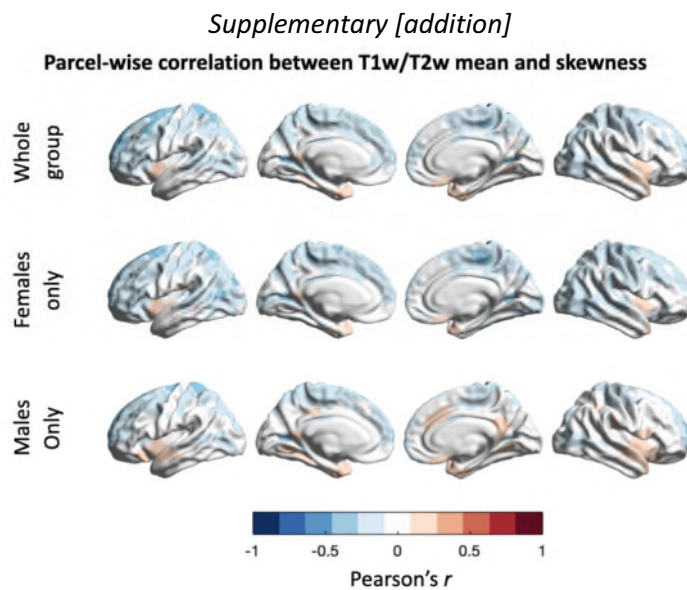

143  
144  
145  
146

**Supplementary Figure 2.** Parcel-wise correlation between baseline T1w/T2w mean and skewness profiles, for the whole group, for females only and for males only. Red areas represent positive correlation between skewness and mean T1w/T2w, blue represent negative correlations.

147  
148  
149  
150  
151  
152  
153  
154  
155  
156  
157  
158  
159  
160  
161  
162  
163  
164  
165  
166  
167  
168  
169  
170  
171  
172  
173  
174  
175  
176  
177  
178  
179  
180

**(4) In lines 192-194, the authors state that “We repeated all analyses additionally controlling cortical thickness as well as for family structure to account for potential confounds of twins in the dataset. Neither changed the original results (supplement 1).”. This is good to know, but a complementary and equally important question whether the spatial patterning of sex effects on microstructure related to the spatial patterning of sex effects on thickness? This is biologically important as it speaks to the spatial congruence or not of sex effects on two intimately related metrics, but it is also methodologically important because sex effects on CT could potentially bias estimation fo sex effects on T1/Tw metrics calculated between gray/white and pial surfaces.**

We thank the Reviewer for their comment. We agree that it is important to prevent cortical thickness bias of T1w/T2w derived metrics sex-effects, which is why we chose a control analysis that takes the spatial variance of this metric into account. We furthermore agree that the discussion of previous findings on morphometrical neuroimaging is informative to the reader and helps to interpret the results biologically and methodologically. We thus addressed this issue in several ways throughout the manuscript: First, we add the following section to the introduction to inform the reader on the congruence between cortical microstructure and morphometrical sex differences (p.3, ll 101; note that we adjust this section also according to suggestion 1):

*Introduction [Addition]*

*“[...] Together, these studies help to identify brain areas that are implicated in sex differences and influenced by sex hormones, however, they cannot show which microstructural features underpin these macro-level differences. In fact, morphometrical sex differences don’t necessarily overlap. For example, while males are characterized by overall higher gray matter volume, females have a generally higher gray matter density, and sex differences in cortical thickness are apparent in development, but become less pronounced in adulthood (Gennatas et al., 2017). Similarly, microstructural effects don’t seem to have a direct one-to-one match with macro-level anatomy. For example, quantitative brain-wide mapping of cell type distributions revealed lower cell density in volumetric larger brain regions in male mice in comparison to the female counterpart (Kim et al., 2017). There has not been a characterisation of human cortical microstructure sex differences in vivo, and it remains elusive if sex hormones might play a role in these variations. This study will thus aid in developing a more nuanced understanding of these anatomical variations. [...]”*

181

182 Second, we added an additional control analysis, where we compute the overlap between sex-  
183 differences in cortical thickness and the three microstructural measures. We detail both control  
184 analysis in the relevant methods section (“Sex-difference and proxies for links to sex hormones”).

185

186 *Methods [adjustments, p. 28, ll 916]*

187 *“We repeated the analysis of all three measures regressing out cortical thickness and including*  
188 *the family structure (interaction between zychosity and family status) as a random effect to*  
189 *demonstrate that our results were not affected by these variables (supplement 3). This suggests sex*  
190 *differences in cortical microstructure go above and beyond local variations in cortical thickness. We*  
191 *furthermore tested for spatial correlations between sex difference in cortical thickness and*  
192 *microstructural markers using spin-tests as described above.”*

193

194 We accordingly add the results of this supplementary analysis to the results section, the supplement  
195 and modified the discussion:

196

197 *Results [Addition, p. 7 ll 227]*

198 *“We repeated all analyses additionally controlling cortical thickness as well as for family*  
199 *structure to account for potential confounds of twins in the dataset. Neither changed the original*  
200 *results (supplement 3). To receive a more nuanced understanding of the relationship between the*  
201 *morphological measure of cortical thickness and our microstructural measures, we additionally*  
202 *computed correlations between effect maps and found that only sex differences in the microstructural*  
203 *mean were negatively related to sex differences in cortical thickness, but the relationship was not*  
204 *significant if correcting for FWE with spin tests ( $r = -0.36$ ,  $p_{spin} = 0.092$ , supplementary figure 4).”*

205

206

*Supplementary [Addition]*

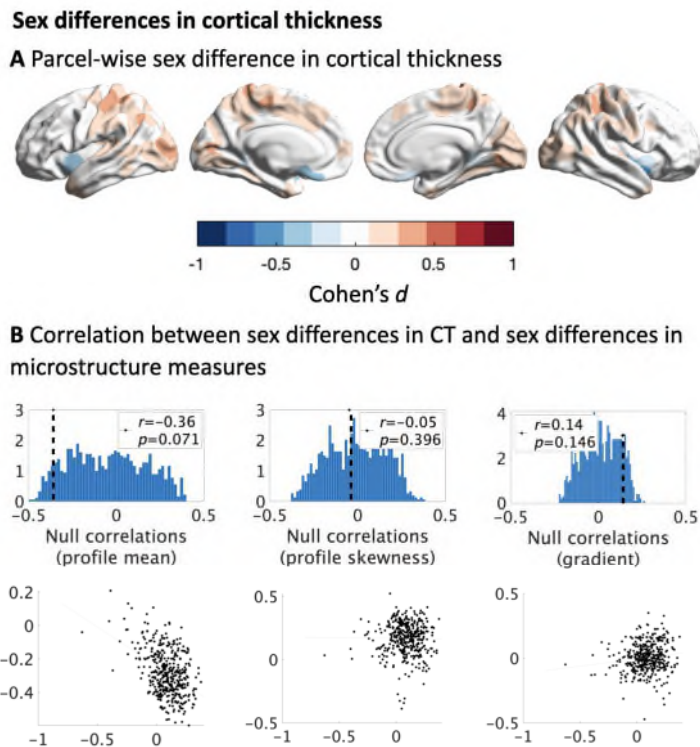

207  
208

209 **Supplementary Figure 4.** Associations between cortical thickness and microstructural sex differences.  
 210 (A) FDR-thresholded Cohen's  $d$  maps showing significant sex differences (females-males) in cortical  
 211 thickness, Red colors represent microstructural values were higher for females, blue represent values  
 212 higher for males. B) Associations between sex differences in cortical thickness and effect values  
 213 (Cohen's  $d$  per parcel) for each of the T1w/T2w profile-based intracortical measures. The upper row  
 214 visualizes zero-distributions between random hierarchies and effect maps in comparison to the  
 215 statistical  $r$ -value, the bottom row plots cortical thickness sex differences on the X-axis, and sex  
 216 differences of microstructural measures on the Y-axis.

217

218

219 Discussion [addition/adjustment, p. 18, ll. 567]

220 “[...] Indeed, in related work in the same sample (Valk et al., 2022), our group observed  
 221 increased coupling of function and microstructure in females in regions that show heightened skewness  
 222 in females. At the same time, sex differences in microstructural measures were consistent above and  
 223 beyond morphometric measures such as cortical thickness. How these different markers relate to each  
 224 other, and what the functional implications of the demonstrated effects are, will be a notion of future  
 225 work. Follow-up studies that focus on the functional implications of the reported microstructural  
 226 measures are required to shine light on functional implications of the reported microstructural sex  
 227 differences.”

228

229 (5.1) The section “Sex differences in intracortical microstructure vary as a function of approximated  
 230 sex hormone concentration (Fig 3.)”. Interpretation of the findings using different female subgroups

231 would benefit from some additional analyses/visualizations. First, it would be good to see a  
232 scatterplot matrix where each cell has a scatterplot of ROIs effect sizes as points and the axes being  
233 contrasts of different female subgroups with males.

234

235 Thank you for this suggestion. To further illustrate the difference between males and females as a  
236 function of female hormonal variation, we added scatter plots illustrating the relative difference  
237 between males and females as a function of hormonal status in females (supplementary figure 7). We  
238 also added a direct contrast between female subgroups which we deemed to be highly informative of  
239 true systematic hormone-related group-differences as well (figure 3).

240

241 *Results [Addition]*

242 *“To further interpret these sex-bias variations by hormonal group, we additionally investigate*  
243 *if i.), the mean sex-difference effect across parcels is conserved between group-comparisons (Figure*  
244 *3B and supplement 6) and ii.), if the microstructural measure of any region also systematically varies*  
245 *in an within-females comparison (Figure 3D). We furthermore added an internal consistency analysis*  
246 *to determine the specificity of the reported effect on the male sample (supplementary Figure 7).”, p.9,*  
247 *ll 274*

248 *[..]*

249 *For the microstructural profile mean, only the OC-group replicated the average initial sex*  
250 *difference effect (post-hoc contrast across 400 parcels between group comparisons n.s.; see*  
251 *supplementary Figure 8 for parcel-wise effect distribution by cortical type). p.9, ll.284*

252 *[...]*

253 *Investigating microstructural skewness, the sex difference effects were most different*  
254 *comparing males with OC vs. any NC female subgroup (for parcel-specific comparisons, see*  
255 *supplementary figure 7)., p.11 ll.330*

256 *[...]*

257 *Comparing the microstructural gradient of males only to subgroups of females of different*  
258 *estimated hormonal profiles changed the distribution, but not the mean of cortex-wide sex differences*  
259 *(all cortex-wide effect size contrasts between any group comparison n.s, Figure 3B). However, parcel*  
260 *and cortical wide specific analysis give a more detailed overview of variations by hormonal subgroups*  
261 *(Figure 3C; supplementary figure 7). p.11 ll. 349*

262

Cortical Types

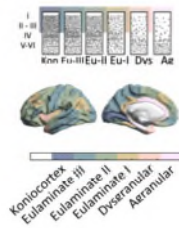

Koniocortex  
Eulaminate III  
Eulaminate II  
Dysgranular  
Agranular

Correlation between effect sizes by parcel, comparing males against different female subgroups: Profile Mean

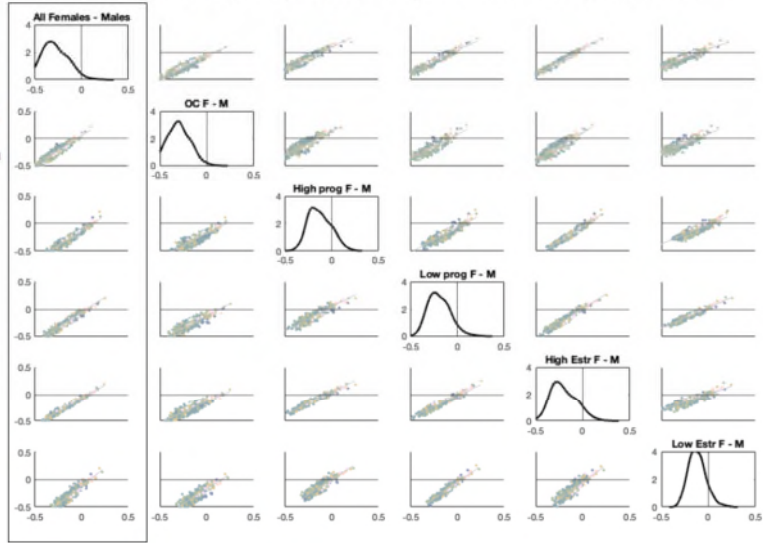

263  
264  
265

Cortical Types

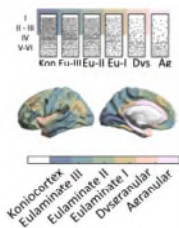

Koniocortex  
Eulaminate III  
Eulaminate II  
Dysgranular  
Agranular

Correlation between effect sizes by parcel, comparing males against different female subgroups: Profile Skewness

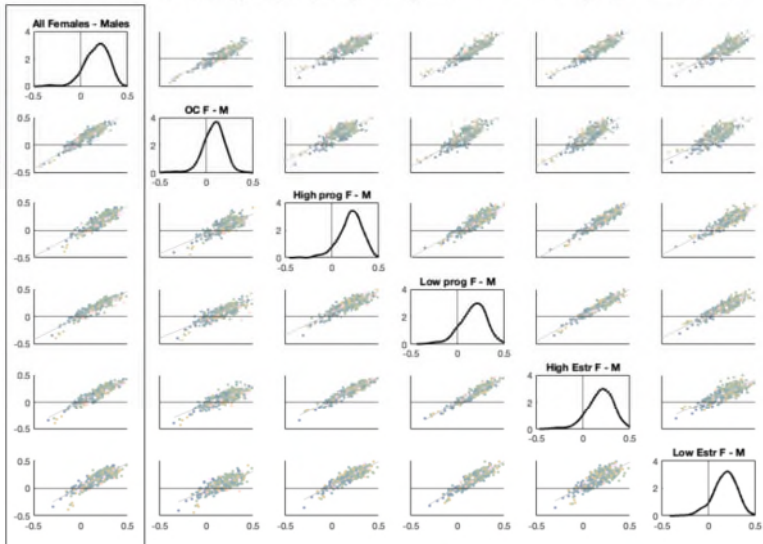

266  
267



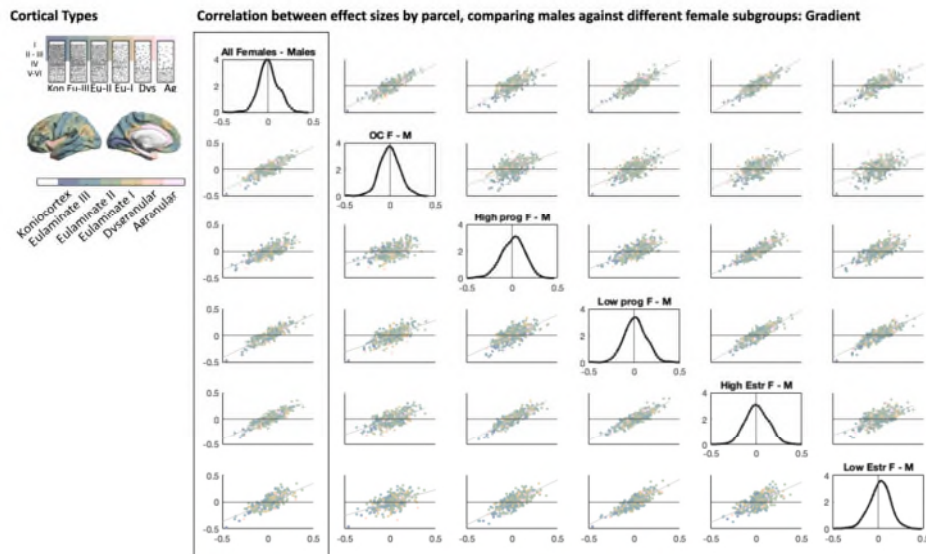

268  
 269 **Supplementary Figure 7.** Effect sizes for sex differences in T1w/T2w profile mean, skewness and  
 270 microstructural gradient per parcel, and how these effects change depending on which female  
 271 subgroups the male subjects are compared to. Females were divided into females who took OC,  
 272 females estimated to be in the high progesterone phase of their menstrual cycle, in the low  
 273 progesterone phase, in the high estrogen phase and in the low estrogen phase, respectively. The  
 274 diagonal shows the sex-difference effect size distributions, and how they shift depending on the  
 275 contrast. Scatter plots show correlation between two respective effects, and the deviance of each  
 276 parcel from the other contrast's effect size. The first column (black box) is the original all females vs.  
 277 all males sex difference effect, compared to all contrasts between males and female subgroups. All  
 278 values represent Cohen's d values (females - males). Parcels are coloured by cortical types (left).  
 279

280

281

282 **(5.2) Second, it would also be important to run these subgroup comparisons using independent**  
 283 **subgroups of males so that you don't have coloring of the effects by a shared property of the male**  
 284 **comparison group.**

285

286 Thank you for this suggestion. We added a Monte-Carlo analysis to analyze the dependence on the  
 287 male sample of the effects at hand. We did so by firstly re-computing the contrasts with 2 randomly  
 288 chosen sub-samples of males that were equally sized to the female subgroup. In  $n = 1000$  splits, we  
 289 then correlated the effect sizes (Cohen's d) of these randomly chosen male subsamples with each  
 290 other. We include the result of this internal consistency analysis as a supplement.

291

292

**Internal consistency - male sample, hormonal contrasts.**

**A) Males vs. OC females**

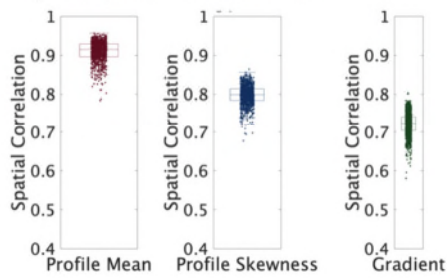

**B) Males vs. High estrogen**

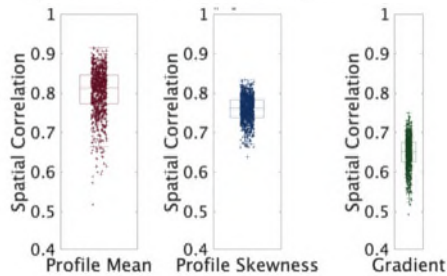

**C) Males vs. Low estrogen**

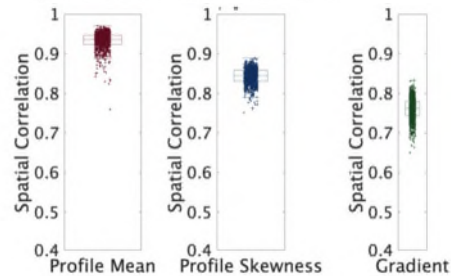

**D) Males vs. High progesterone**

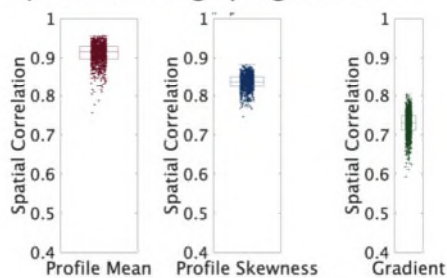

**E) Males vs. Low progesterone**

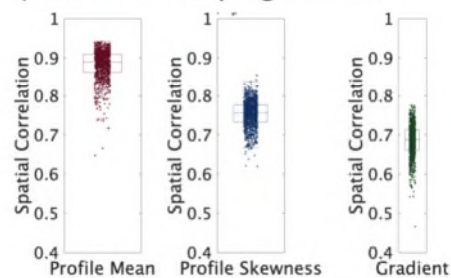

293  
294  
295  
296  
297  
298  
299  
300  
301

**Supplementary Figure 7.** Split-correlation of 1000 random permutations for all hormonal contrasts and each microstructural measure. For every split, we computed the contrast between males and females, randomly choosing only a subsample of males, such that  $n(\text{males}) = n(\text{females})$ . We then computed the internal consistency for this randomly chosen male subsample by correlating the effect sizes of this contrast with the Cohen's  $d$  effect sizes of an equally sized and randomly chosen subsample of males. Datapoints represent correlation values for each split.

302  
303  
304  
305  
306  
307  
308  
309

Here, we find that the sex difference effect is generally least dependent on  $N$  and the male sample for profile mean, stable for profile skewness and only moderately consistent for the gradient. Furthermore, the contrast with OC females, low estrogen and high progesterone females prove to be most stable across folds, yielding a mean consistency of higher than 0.9 for mean, higher than 0.8 for skewness, and higher than 0.7 for the gradient. Notably, these consistency values are higher than for our complete sample (Figure 2C).

*Results, p. 8, ll.270*

310 „To further interpret these sex-bias variations by hormonal group, we additionally investigate if first,  
311 the mean sex-difference effect across parcels is conserved between group-comparisons (**figure 3B** and  
312 **supplement 6**) and second, if the microstructural measure of any region also systematically varies in  
313 an within-females comparison (**Figure 3D**). We furthermore added an internal consistency analyses to  
314 determine the specificity of the reported effect on the male sample (**supplementary figure 7**).“

315

316 *Discussion, p. 18 || 577*

317 „We show that sex differences in all microstructural measures change in effect size or even disappear  
318 if males are compared to females of certain estimated hormonal profiles, while randomly subsampling  
319 the male group yields coherent results. This suggests that female sex hormones may play a role in  
320 microstructural sex differences in the human cortex.“

321

322 **(5.3.1) Third, it would also be important to mention Sup Fig 4 results more in the main text here**  
323 **here and use this to specify which regions are significant.**

324 Thank you for this suggestion. We decided to include part of Sup Fig 4 into the main figure about this  
325 part of the study, Figure 3C; and add an additional analysis for this section which further helps to  
326 understand regional specificity of results (Figure 3D). We revised the entire section (results, discussion  
327 and supplement) to adjust it to your and the other Reviewers' comments. Please find key highlights of  
328 these adjustments below:

329

330 *[...] We show that this is because intracortical profile skewness values of females who take OC*  
331 *compared to NC females are significantly lower in precuneus, posterior and anterior cingulate, insula*  
332 *and temporal pole (**Figure 3D**). These are the same areas in which the T1w/T2w skewness sex*  
333 *differences are smaller if one compares males only to females who take OC (**Figure 3C**). This was*  
334 *expected as the intracortical profile skewness in these areas is generally lower than in females,*  
335 *demonstrating the more steep ratio of T1w/T2w signal intensity from pial to GM/WM surface in males.*  
336 *Females in their low progesterone group hereby were most similar to OC females, while the high*  
337 *estrogen and progesterone group seem to mainly drive these differences (**Figure 3D**).*

338

339 *“[...] However, parcel and cortical wide specific analysis give a more detailed overview of variations by*  
340 *hormonal subgroups (**Figure 3C**; supplementary figure 7). The sex difference effect varied strongest*  
341 *when comparing males to only OC takers versus comparing males to only females estimated to have*  
342 *high progesterone levels: Sex differences between OC takers and males were least extreme (min*  
343  *$d_{OC\ females} = -.4636$ , max  $d_{OC\ females} = .3134$ ), while sex differences between males and females in*

344 *their high progesterone phase showed particularly big positive and negative effect sizes (min*  
345  *$d_{high\ prog\ females} = -.5980$ ,  $max\ d_{high\ prog\ females} = .3398$ ).*”

346

347 *[...] Investigating the female differences more closely, we find that the insula’s microstructural profile*  
348 *covariance is closer with the fugal anchor of the gradient in NC than in in OC females; which seems to*  
349 *be associated with by the low estrogen and low progesterone groups (Figure 3D).*

350

351 **(5.3.2) In this Sup Fig, I think it would be clearer if visualizations simply used 3 block colors given**  
352 **these are port thresholding: white no sig effect and red/blue for sig effects in each direction.**

353

354 Thank you for this suggestion. It was indeed challenging to visualize the results in a fashion that is  
355 clean and easily readable. We now include 3 analyses in this section, for which we provide 4  
356 visualizations (figure 3B, 3C, 3D and supplementary figure 7): first, we show how the distribution and  
357 mean of the overall effect size varies between group-comparisons (3B), second, we show how the  
358 effect size varies across brain areas for three exemplary group-comparisons (3C) third, we show how  
359 robust the microstructural differences in certain brain areas are by running a within-females group  
360 comparison (Figure 3D), and fourth, we show how the effect-sizes between subgroup-comparisons  
361 correlate with each other per parcel (supplementary figure 7).

362 However, we would like to avoid block colors for the following reason: In this part of the analysis, we  
363 show differences in effect-size as well as significance. With the shading of blue and red, one can see if  
364 the effects are stronger or weaker in the different group comparisons. Using block-colors would  
365 prevent the reader from seeing the point of this analysis: the effect size changes depending on the  
366 female subgroup. We hope this clarifies.

367

368 **(5.4) Fourth, are the different effects seen for different female subgroups reflecting changes in the**  
369 **magnitude of the effects, or differences in interindividual variability between the different female**  
370 **subgroups? This would be important to clarify empirically.**

371

372 Thank you for this valuable comment. This is one of the key changes we made to this  
373 resubmission and we believe that with this piece of feedback, we could substantially improve the  
374 results and robustness of this work. The main finding of this analysis is that there is a systematic  
375 difference between females who take OC and females who naturally cycle. We discuss these results  
376 both in relation to the sex-differences and hormonal grouping, add more explanation and dive deeper

377 into the details and interpretation of this result, such that its overall importance is further underscored  
378 in the text.

379 Specifically, we followed up our initial analyses with seven additional GLMs in which we only  
380 included females and then computed contrasts between the respective groups: naturally cycling vs.  
381 taking OC, high estrogen vs. low estrogen, and high progesterone vs. low progesterone; OC vs high  
382 estrogen; OC vs low estrogen; OC vs high progesterone, OC vs low progesterone. Note that since the  
383 estrogen and progesterone groups are not mutually exclusive, we did not compute this contrast.

384

385 *results, p.9 ll.279*

386 [...] “To further interpret these sex-bias variations by hormonal group, we additionally  
387 investigate if first, the mean sex-difference effect across parcels is conserved between group-  
388 comparisons (**figure 3B** and **supplement 6**) and second, if the microstructural measure of any region  
389 also systematically varies in an within-females comparison (**Figure 3D**). We furthermore added an  
390 internal consistency analysis to determine the specificity of the reported effect on the male sample  
391 (**supplementary figure 7**).

392 For the microstructural profile mean, only the OC-group replicated the average initial sex  
393 difference effect (post-hoc contrast across 400 parcels between group comparisons n.s.; see  
394 supplementary figure X for parcel-wise effect distribution by cortical type). [...] We found that the sex  
395 bias in the average T1w/T2w microstructural measure was least stable in the occipital lobe (**Figure 3C**).  
396 Here, the sex bias was particularly large when comparing males to females who took OC, but  
397 disappeared for females in their low progesterone group. Accordingly, for an intra-females contrast,  
398 we find that the occipital lobe of females who regularly take OC have a significantly lower T1w/T2w  
399 profile mean than the occipital lobe of naturally cycling females, and in particular those grouped for  
400 low progesterone (**Figure 3D**). The T1w/T2w profile mean of males is generally higher than those of  
401 females, which explains the bigger sex differences when comparing males exclusively to OC females.”

402 [...]

403 “Investigating microstructural cortical layer skewness, the sex difference effects were most  
404 different comparing males with OC vs. any NC female subgroup (for parcel-specific comparisons, see  
405 supplementary figure 7). In fact, the previously reported sex difference in microstructural profile  
406 skewness nearly disappeared when comparing males to females who regularly take OC (cortex-wide  
407 average  $d_{OC\ females} = 0.0788$ , **Figure 3B**), and was even more pronounced when comparing males only  
408 to females estimated to have high progesterone concentrations (cortex-wide average  
409  $d_{high\ prog\ females} = 0.1995$ ). We show that this is because intracortical profile skewness values of  
410 females who take OC compared to NC females are significantly lower in precuneus, posterior and

411 *anterior cingulate, insula and temporal pole (Figure 3D). These are the same areas in which the*  
412 *T1w/T2w skewness sex differences are smaller if one compares males only to females who take OC*  
413 *(Figure 3C). This was expected as the intracortical profile skewness in these areas is generally lower*  
414 *than in females, demonstrating the more steep ratio of T1w/T2w signal intensity from superficial to*  
415 *deep cortical layers in males. Females in their low progesterone group hereby were most similar to OC*  
416 *females, while the high estrogen and progesterone group seem to mainly drive these differences*  
417 *(Figure 3D)."*  
418

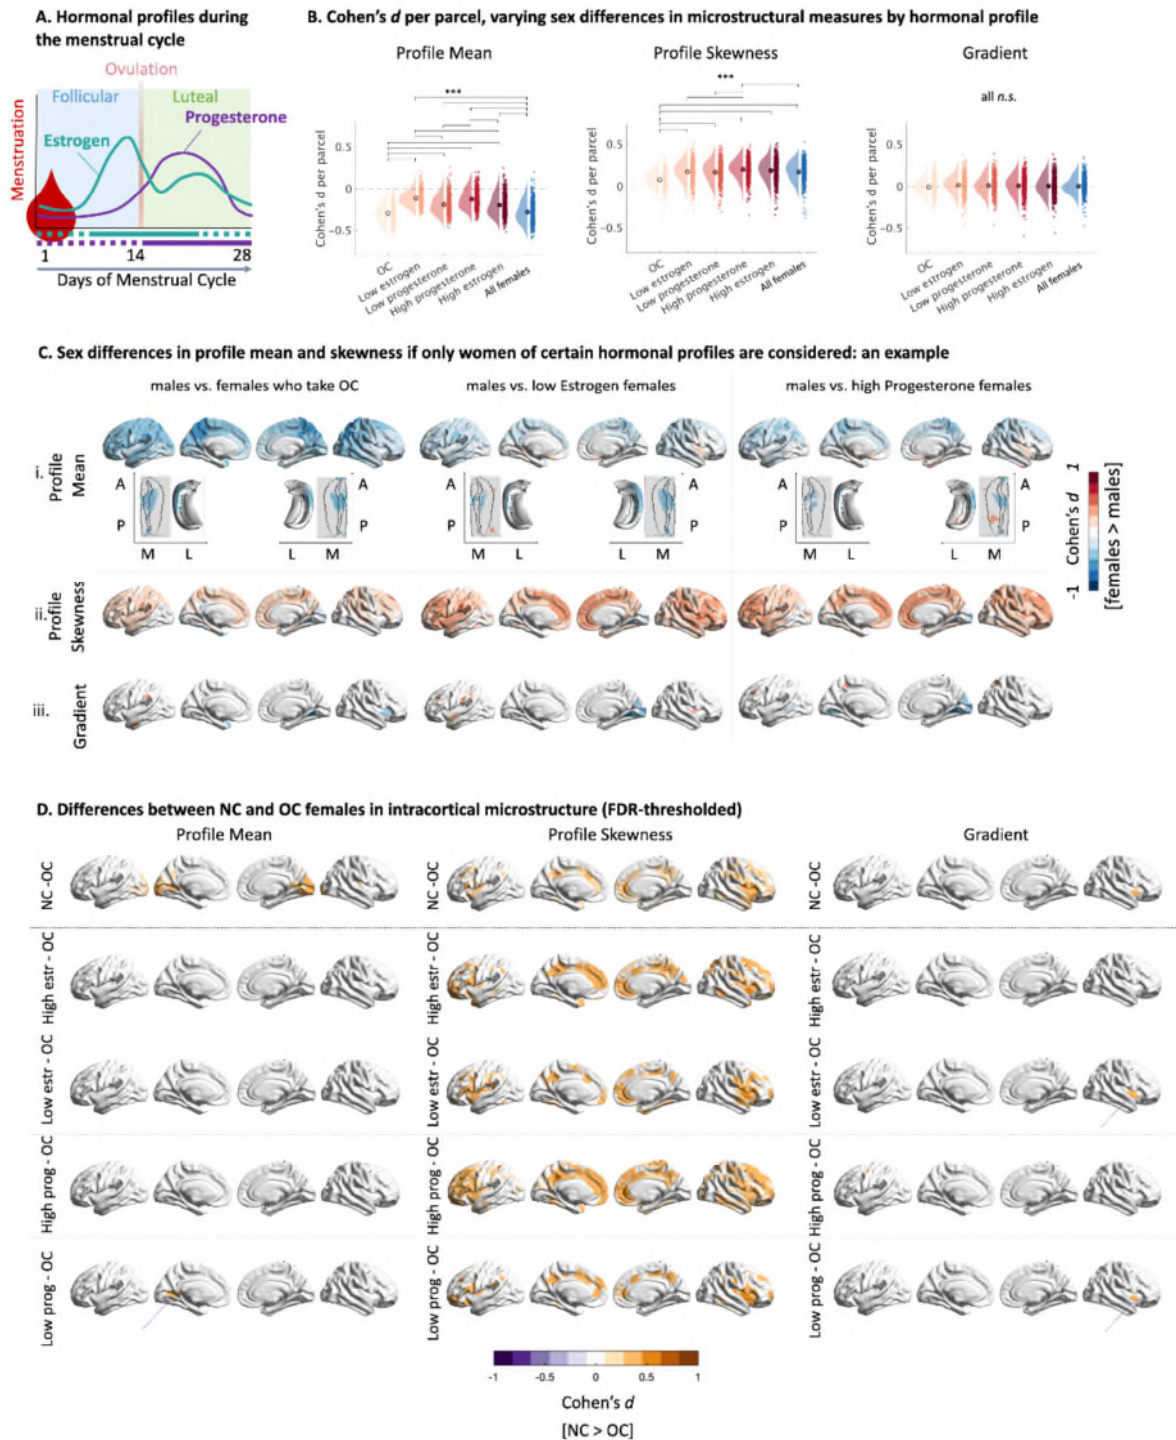

419

420 **Figure 3. Comparing males to different female sub-samples, grouped by menstrual cycle phase.** (A)  
 421 Estrogen and progesterone fluctuate with the menstrual cycle. Horizontal lines under the x-axis  
 422 indicate grouping: purple reflects progesterone (dotted = low; solid = high); turquoise reflects estrogen  
 423 (dotted = low; solid = high) (B) Hormones determine cortex-wide sex-difference effect sizes based on  
 424 post-hoc contrast on cortex-wide effect sizes. Cohen's *d* per parcel is plotted separately for the three  
 425 intracortical measures profile mean, profile skewness and the gradient, respectively for each sub-  
 426 group-comparison. All shown contrasts were significant ( $p < .001$ ). (C) FDR-thresholded Cohen's *d* maps  
 427 of T1w/T2w profile mean (i) between males and subsamples of females divided by OC use and  
 428 menstrual cycle phase projected on the cortical surface and the hippocampus. (ii) FDR-thresholded  
 429 Cohen's *d* maps of T1w/T2w profile skewness between males and female subsamples mapped on the

430 cortex. (iii) FDR-thresholded Cohen's *d* map of differences in the microstructural gradient between  
431 males and different female sub-samples. For completeness, all other FDR-thresholded Cohen's *d* maps  
432 (all group-comparisons, for each of the three measures) are plotted in supplementary figure 4. D)  
433 Microstructural differences between female groups, comparing OC females with all NC females, as well  
434 as OC females with specific NC subgroups, divided by their hormonal period. Columns are the three  
435 microstructural measures T1w/T2w mean, T1w/T2w skewness, and the microstructural gradient.  
436 Purple areas are parcels which had significantly higher values for OC females, orange had significantly  
437 higher values for NC females after FDR-thresholding (all Cohen's *d*).  
438

439

440 **(5.5) Fifth, it is striking that the OC group show preservation of the full group effect for mean T1/T2,**  
441 **but loss of the full group effect for skew. Moreover – the situation was not the same in the**  
442 **hippocampus. These are very challenging dissociations to explain biologically. What thoughts do the**  
443 **authors have ?**

444

445 Thank you for this important note. In fact, it was our wording that was misleading, while the  
446 results are not contradictory in itself. To allow for a straight-forward interpretation, we added the  
447 same ANOVA and post-hoc contrasts for the hippocampus as we did for the cortex-wide analysis (see  
448 **supplementary figure 6**); and adjusted the wording in the text. These analyses clarify that in fact there  
449 is a differentiation between mean and skew in the isocortex, but consistent changes in the isocortex  
450 and hippocampus with respect to mean T1wT2w. Different effects between mean and skewness of  
451 intracortical profiles point towards a differentiation between microstructural changes with respect to  
452 sex differences and OC in superficial and deeper cortical compartments, possibly linked to sex  
453 hormone receptor expression that has been reported to vary across cortical layers

454 Just as for the overall cortex-mean, the *mean* of the initial sex-difference effect across all  
455 vertices in the hippocampus was the same only when comparing males to females who regularly took  
456 OC, but not if comparing males to any of the NC female groups (post-hoc contrast n.s.). Visualizing the  
457 parcels, however, it shows that this is most likely due to the fact that more negative and more positive  
458 effects in the collapsed comparison cancel each other out, and thus lead to the same average effect  
459 for both comparisons (see supplementary **figure 6**). Within the NC groups, there was no difference in  
460 sex-bias if comparing males to females in their low or high estrogen group, but the low and the high  
461 progesterone group were both significantly different from the initial, the OC, and the estrogen-group  
462 effects. However, there was no significant group-difference in T1w/T2w mean in the hippocampus  
463 between any female group.

464 Furthermore, the within-female groups analysis above also provides some clarity for this  
465 question: More areas change their skewness with hormones than the mean T1w/T2w profile; so on a  
466 parcel-wise level (but not average across the whole brain), skewness varies more with hormones than



467 the meant T1w/T2w measure. For the hippocampus, we were only able to analyze the profile mean,  
 468 but not the profile skewness, since we couldn't build meaningful profiles between the outer and inner  
 469 hippocampal layers due to technical limitations. Similar to the mean T1w T2w, we only see small  
 470 changes in sex-difference effects. Contrasting NC and OC and high and low estrogen and progesterone  
 471 females does not survive multiple comparisons in any parcel in the hippocampus, furthermore  
 472 supporting the notion of smaller variations in T1w/T2w mean with sex hormones.  
 473

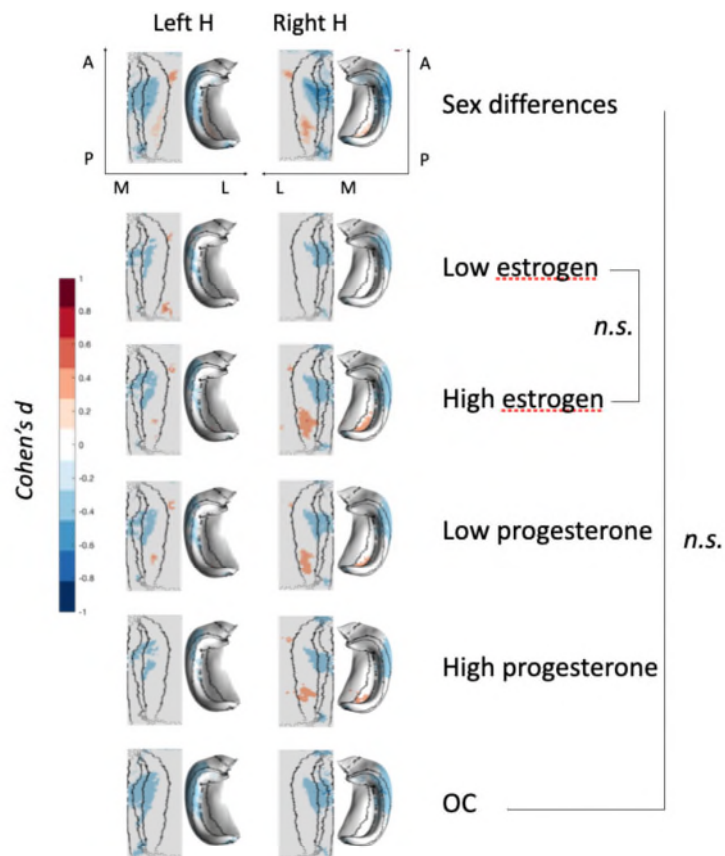

474  
 475 **Supplementary Figure 6.** FDR-thresholded Cohen's *d* maps of T1w/T2w profile mean between males  
 476 and subsamples of females divided by OC use and menstrual cycle phase projected on the unfolded  
 477 hippocampus. On average, all effects are different from each other. Brackets (*n.s.*) on the right show  
 478 where this is not the case, i.e. where the average effect across vertices replicates.  
 479

480  
 481 *Discussion - hippocampus, from p.22, ll.716 [Adjustment]*

482  
 483 “[...] Importantly, however, we couldn't identify a robust effect when computing inter-female contrasts  
 484 for any region in the hippocampus. Thus, while we here show that taking the hormonal profile into  
 485 account matters when investigating hippocampal-wide microstructural sex-differences, this study does  
 486 not yield evidence for systematic hormone-related differences within females.

487 Overall, these findings extend previous work showing region-specific hippocampal sex  
488 differences and variations in these effects in relation to sex hormones. Similar to previous studies we  
489 again find that anterior-posterior differences within the hippocampus are substantial and need to be  
490 considered (Masouleh et al. 2020, Genon et al., 2021). Through unfolding the hippocampus we  
491 increased regional specificity, considering the morphology of the hippocampus<sup>64</sup>. Further work  
492 studying the impact of sex hormones on hippocampal structure may use similar techniques to capture  
493 regional variation. “

494

495 **(5.6) Finally, given the complexity of this results section, I would suggest providing readers a “mini-  
496 summary” with some key take aways at the end, around line 285.**

497 Thank you for this suggestion. We agree that this will be very helpful to clarify the main message of  
498 this section. We add the following mini-summary after this section of the **results (p.11, ll. 358):**

499

500 *“To summarize, sex-differences in intracortical microstructural measures differ in effect size if  
501 males are systematically compared to females roughly clustered in groups of different estimated  
502 hormonal profiles. These variations are driven mainly by microstructural differences between naturally  
503 cycling and regular OC intaking females and are most consistent for profile skewness. Between these  
504 two groups, in particular the limbic, the prefrontal and the insular cortex showed strong differences in  
505 profile skewness. Together, these results underline the importance of considering hormonal profiles  
506 when investigating sex differences or sex-specific brain anatomy.”*

507

508

509 **(6.1) The section “Endocrine plasticity effects on intracortical structure spatially overlap with  
510 cortical expression patterns of sex hormone related genes (Figure 4)”. First, was correction made  
511 for multiple comparisons across genes and maps ?**

512

513 Thank you for spotting this crucial omission of ours - they were not. Our results don't remain  
514 significant at a FDR-corrected threshold, which we now add explicitly in the text and discuss as a  
515 limitation. We demonstrate, however, that instead of computing multiple tests, one can demonstrate  
516 the link between the mean sex-difference map and sex-hormone-relevant transcriptomic maps with  
517 a single multiple regression which we now include in the analysis.

518

519 Methods, p.30; ll.998

520           *“We followed a two-step procedure. First, we tested if hormone-related genes overall were*  
521 *related to the sex-difference maps by running a multivariate regression including all transcriptomic*  
522 *maps. To test for significance, we randomly permuted the sex-difference maps 1000 times, and ran a*  
523 *multivariate regression each, computing a distribution of F-values. In the end, we computed the spin-*  
524 *corrected p-value by computing the proportion of permuted F-statistics that are greater than the*  
525 *original F-statistic. Second, we tested the relationship between the individual genes and the sex-*  
526 *difference maps of each microstructural measure. We computed spearman correlations between gene*  
527 *expression enrichment for each of the selected GOIs with the observed differences in cortical*  
528 *microstructure between males and females. To control for spatial autocorrelations of gene enrichment*  
529 *analysis due to spatial non-independence of brain maps, we tested for significant spatial overlap*  
530 *between the respective transcriptomic map relative to randomly spun phenotype maps (i.e. our effect*  
531 *maps of sex differences). For that, we adjusted the spin-test function from the ENIGMA toolbox, so that*  
532 *spherical representations of the unthresholded three phenotypic maps were randomly spun in 1000*  
533 *permutations and correlated with the 25 transcriptomic maps of our GOIs (Alexander-Bloch et al.,*  
534 *2018). This procedure accounts for spatial autocorrelations by leveraging the spherical representations*  
535 *of the cerebral cortex. We report the frequency in which the true correlation between phenotypic maps*  
536 *and genes exceeded a test statistic generated of correlation values from randomly permuted*  
537 *phenotypic maps as spin-p-value. To account for multiple-tests, we furthermore compute FDR-*  
538 *thresholds for each of these spin-p values. Additionally, to provide a measure of genetic specificity, we*  
539 *generated a measure of “brain-gene-baseline” and tested our effects against the baseline. We built*  
540 *the baseline transcriptomic map by extracting the principal component of all available transcriptomic*  
541 *maps in the left hemisphere. We provide spatial correlations (spearman) between phenotypic maps of*  
542 *sex differences in profile mean, skewness and gradients with the brain gene baseline as a reference.”*

543

544           Results, p.12 ll. 377:

545           *“[...] We thus next asked whether transcriptomic maps of 25 sex steroid relevant genes were*  
546 *generally linked to sex-difference effect maps for each microstructural measure (Cohen’s d of sex*  
547 *differences in microstructural profile mean, skewness and covariance gradient), and then tested for*  
548 *each of these 25 gene individually if they spatially overlapped with our microstructural sex difference*  
549 *maps. Please note that none of these individual links was significant at a FDR-corrected threshold, and*  
550 *should thus not be considered more than trends.*

551           *We found that sex-hormone related genes were enriched in areas in which we found sex-*  
552 *differences in microstructural mean ( $F(336, 310) = 6.6, p_{spin} < .05$ ), but not in microstructural profile*  
553 *skewness ( $F(336, 310) = 3, n.s.$ ) or the microstructural gradient ( $F(336, 310) = 1.9, n.s.$ ).*

554 [...]

555

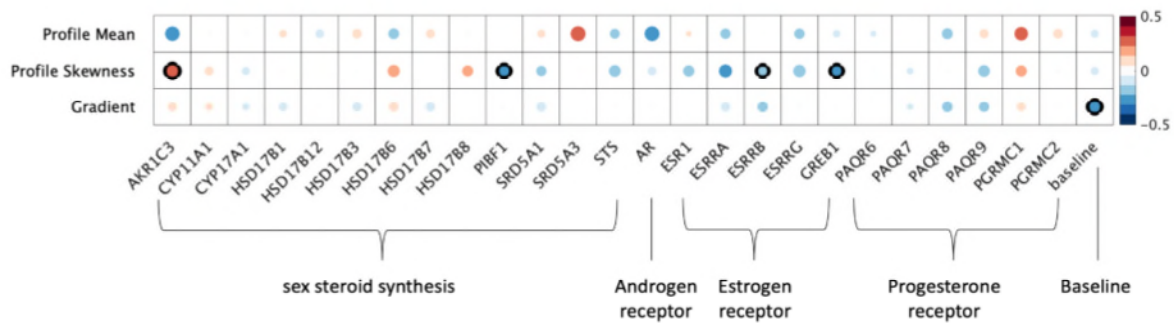

556

557 **Figure 4. Spatial overlap between effect maps of sex differences for the microstructural gradient,**  
558 **profile mean and profile skewness.** Transcriptomic maps of genes are sorted by categories: sex  
559 hormone synthesis related genes, androgen receptor related, estrogen receptor related genes, and  
560 progesterone receptor related genes. We test for spatial specificity by comparing against the principal  
561 component of all genes (baseline). Shades of red represent positive  $r$ -values, shades of blue represent  
562 negative correlations; circle size and shading indicate size of correlation. Values with significant  $p$ -  
563 values after permutation spin-testing are marked with a black outline. **Note that no correlation is**  
564 **significant when accounting for multiple testing at an FDR-threshold.**

565

566

567 **(6.2) Second, for most of genes examined, their spatial correlations with the three metrics did not**  
568 **reach statistical significance as it, i.e.,  $p_{spin} < 0.05$ . However, the authors describe these**  
569 **nonsignificant findings as in line 311, Strong overlap were additionally presented by the androgen**  
570 **receptor gene AR ( $r = -.31$ ,  $P_{spin} = .15$ ) and the progesterone receptor PGRMC1 ( $r = .26$ ,  $P_{spin} = .20$ ),**  
571 **and using them as support (line 536 to 538) to draw a conclusion, strongly overlapped with sex**  
572 **hormone gene expression levels (line 624). This should be reworded.**

573

574 We reworded it as follows:

575 Results, p.12, ll. 385:

576 "Testing each transcriptomic map individually, we identified **medium sized correlations, but**  
577 **not significant after spin-testing,** between sex-differences in microstructural profile mean and the  
578 transcriptomic map of the androgen-receptor activation related genes SRD5A3 ( $r = .31$ ,  $p_{spin} = .07$ )  
579 and AKR1C3 ( $r = -.30$ ,  $p_{spin} = .11$ ), the androgen receptor gene AR ( $r = -.31$ ,  $p_{spin} = .20$ ) and the  
580 progesterone receptor PGRMC1 ( $r = .26$ ,  $p_{spin} = .17$ ). We further found a **significant after controlling**  
581 **for spatial auto-correlation, but small spatial overlap** with the sex steroid precursor gene HSD17B3 ( $r$   
582  $= .13$ ,  $p_{spin} < .05$ ).

583 Sex-bias in T1w/T2w microstructural profile skewness demonstrated **small spatial associations**  
584 with Progesterone Immunomodulatory Binding Factor 1 (PIBF1,  $r = -.25$ ,  $p_{spin} < .05$ ), the estrogen  
585 receptor 1 (ESR1,  $r = -.18$ ,  $p_{spin} < .05$ ), the estrogen receptor beta (ESRB,  $r = -.22$ ,  $p_{spin} < .05$ ), and the Growth

586 *Regulating Estrogen Receptor Binding 1 (GREB1,  $r = -.24$ ,  $p_{spin} < .05$ ). There was a moderate but non-*  
587 *significant (after permutation tests) correlation between skewness sex-differences and the estrogen*  
588 *receptor alpha (ESRA,  $r = -.24$ ,  $p_{spin} = .27$ ) and the estrogen related receptor gamma (ESRG,  $r = -.22$ ,*  
589  *$p_{spin} = .23$ ). Lastly, sex differences in skewness also moderately overlapped with the sex-hormone*  
590 *synthesis relevant gene AKR1C3, which was not significant after controlling for spatial auto-correlation*  
591 *( $r = .31$ ,  $p_{spin} = .05$ ). The gene specificity for profile mean and the profile skewness sex difference was*  
592 *supported by a non-significant and negligible correlation with the baseline gene map we extracted.*  
593 *This was, however, not the case for the microstructural gradient, which correlated stronger with the*  
594 *baseline gene factor than with any other transcriptomic map ( $r = -.28$ ,  $p_{spin} < .05$ , significant at FDR-*  
595 *corrected threshold)."*

596

597 Discussion

598 *"To support the evidence of our first endocrine analysis, we added a second, independent one. We*  
599 *show that the differences that we systematically observe between males and females present*  
600 *moderate overlap with areas of elevated expression levels of sex hormone related genes.*

601 [...]

602 *Importantly, while our analyses demonstrate a general link between sex-hormone specific*  
603 *genes and the microstructural mean, gene specificity for sex steroid synthesis and sex hormone*  
604 *receptor genes, and account for auto-correlations, the links to individual hormones were not significant*  
605 *at an FDR threshold, controlling for number of genes and measures. [...]"*

606

607

608

609 **(6.3) Third, there is insufficient attention given - in analytic design, presentation of results and**  
610 **discussion of results - to the fact that the AHBA dataset contains only one female. Therefore, all the**  
611 **expression maps examined are predominantly from the 5 male donors. Analytically, it would be**  
612 **important to provide some evidence that the reported connections between imaging and**  
613 **transcriptomics are at least trending in the same direction when expression maps are based on the**  
614 **single female donor. It is also important to say much more in Discussion and Limitations regarding**  
615 **the problem of sex imbalance in AHBA and what it means the authors can and can't say regarding**  
616 **their results.**

617

618 This is a very valuable comment, we thank the Reviewer for pointing out this limitation. We followed  
619 up the initial analysis by separating the AHBA dataset by sex of its donors and computed if the overlap

620 between sex difference maps with only female, only male, and all AHBA donors correlate with each  
621 other:

- 622 ● Overlap between results based on female only and male only
  - 623 ○ gradient Spearman's  $r = 0.0603$
  - 624 ○ mean Spearman's  $r = 0.5119$
  - 625 ○ skewness Spearman's  $r = 0.6028$
- 626 ● Overlap between results based on female only and all AHBA donors
  - 627 ○ gradient Spearman's  $r = 0.2$
  - 628 ○ mean Spearman's  $r = 0.4638$
  - 629 ○ skewness Spearman's  $r = 0.7754$
- 630 ● Overlap between results based on males only and all AHBA donors
  - 631 ○ gradient Spearman's  $r = 0.7688$
  - 632 ○ mean Spearman's  $r = 0.7964$
  - 633 ○ skewness Spearman's  $r = 0.8172$

634

635 This result indicates that albeit, as expected, the results are mainly driven by the male donors, there  
636 is moderate to high overlap when only considering the female donor with the initial results for  
637 skewness. Being the most robust result throughout all analyses, this further supports the notion that  
638 the skewness-sex differences are indeed related to sex hormones. The limitation for considering only  
639 the female donor is that with a dataset of  $n = 1$ , we are fully susceptible to the individual specifics of  
640 that one donor. We add the following sections in methods, results and discussions on this matter:

641

642 **Methods, p. 31, from II 1005:**

643 *"Lastly, to account for the sex-imbalance in the AHBA dataset (one female and five male donors), we*  
644 *reran the analysis as described above separately for the male and female donors only (supplementary*  
645 *figure 8). We then computed Spearman's rank correlation to test if results statistically trend in the*  
646 *same direction."*

647

648

649 **Results, p. 13, from II. 396:**

650 *"Note that the AHBA dataset from which we derived the transcriptomic maps is composed from only*  
651 *one female and five male donors. We thus tested if the results identified here trend in the same*  
652 *directions if rerunning the analysis with the female or male donors only (supplementary figure 8). We*  
653 *find that this is the case (profile skewness:  $r_{female-all} = 0.7754$ ;  $r_{female-male} = 0.6028$ )."*

654  
655  
656  
657  
658  
659  
660  
661

**Discussion, p. 21, from ll. 660:**

*“Furthermore, even though our analyses suggest that these results are broadly similar across sex of the six donors that make up this transcriptomic sample, it will be important to revisit this analysis once a sex-balanced dataset becomes available.”*

**Only female donor.**

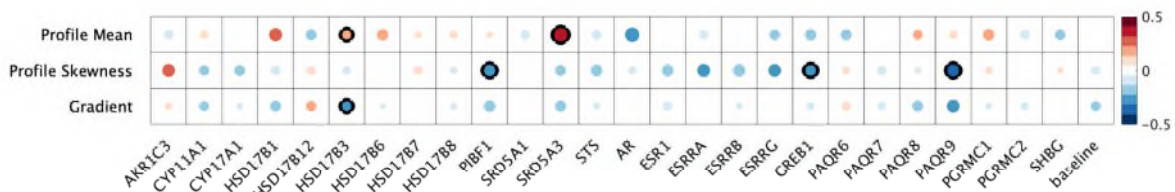

662  
663  
664

**Only male donors.**

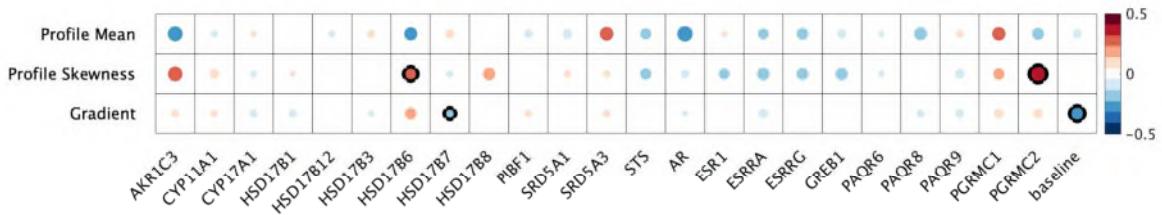

665  
666  
667  
668  
669  
670  
671  
672  
673  
674  
675

**Supplementary Figure 8. Spatial overlap between effect maps of sex differences for the microstructural gradient, profile mean and profile skewness, split by AHBA donor-sex.** Top and bottom are the same analysis, but considering only the female (top) and male (bottom) AHBA donors to derive the transcriptomic maps. Transcriptomic maps of genes are sorted by categories: sex hormone synthesis related genes, androgen receptor related, estrogen receptor related genes, and progesterone receptor related genes. We test for spatial specificity by comparing against the principal component of all genes (baseline). Shades of red represent positive r-values, shades of blue represent negative correlations; circle size and shading indicate size of correlation. p-values < 0.05 after correcting for auto-correlations using spin-testing are marked with a black outline.

**(6.4) Finally, the corresponding Discussion section title should be changed to “Transcriptomics” decoding rather than “Genetic decoding”. The authors are not looking at genetic variation.**

This is of course correct, thank you for spotting this error. We changed the heading in the Methods section from “Genetic Decoding” to “Transcriptomics”.

680

681 **(7.1) Sections comparing sex difference to cytoarchitecture and cerebral blood flow. The question**  
682 **of multiple comparisons comes up here too.**

683 As for the genetic analysis, we add FDR adjusted Benjamini-Hochberg significance thresholds to the  
684 cytoarchitectural results, as well as to the cerebral blood flow results and report this accordingly. This  
685 did not change the cytoarchitectural result. None of the cerebrovasculature correlations were  
686 significant at an FDR-threshold.

687

688 *Cytoarchitecture:*

689 *[...] As before, we report statistical correlation values and the respective max-permutation test p-value*  
690 *after spherical spin-tests ( $p$ -spin), and indicate if they remain significant at a FDR-corrected threshold.*

691 *We found that the effect maps of sex differences in microstructural skewness and the*  
692 *microstructural gradient significantly correlated with the hierarchy of cortical types at a FDR-corrected*  
693 *threshold, but not for microstructural mean (Figure 5B).*

694

695 *Cerebrovascular control analyses:*

696 *[...] "In addition to including intracranial volume as a covariate in every linear model, we thus tested if*  
697 *the relation to sex hormone concentration would covary with the local density of cerebral vasculature*  
698 *(supplementary figure 9). Since no correlation remains significant at a FDR-corrected threshold, we still*  
699 *report spin-permutation corrected p-values ( $p$ -spin)."*

700

701 **(7.2) Also, the authors discuss similar correlations with some inconsistency. For example in the**  
702 **section starting on line 336, the authors state Sex differences differ in strength as a function of**  
703 **cytoarchitectural type (Figure 5), show that A positive correlation between T1w/T2w profile**  
704 **skewness ( $r = .20$ ,  $P_{spin} < .05$ ) and cortical types (line 348) and sex difference effects in the**  
705 **microstructural gradient showed moderate overlap with the hierarchy of cortical types ( $r = .14$ ,**  
706  **$P_{spin} < 0.05$ ). Then on the section starting in line 367 the authors find some similarly sized**  
707 **correlations with maps of cerebral vasculature. However, these similar correlations are interpreted**  
708 **in different ways in the Discussion section, where the relationship with cytoarchitecture is treated**  
709 **a positive finding, whereas the vasculature correlations are downplayed. For example: we provide**  
710 **evidence that the observed effect was not confounded with hormone-induced fluctuations in**  
711 **cerebrovascular blood flow (line 412), The moderate overlap mean T1w/T2w effects with cerebral**  
712 **vein density furthermore (line 430), and Adding to this, we found that this measure was not affected**  
713 **by vasculature (line 625). It would be important to address such imbalances in interpretation.**

714



715 Thank you for pointing out this imprecision. It is important to us to not give the impression of artificially  
716 downplaying or inflating our results to our subjective liking, so we appreciate the feedback and hope  
717 we were able to address it accordingly. In particular after adding the Benjamini-Hochberg FWE  
718 correction to all correlative results, we adjusted the wording such that in particular the genetic results  
719 should be considered with care. We furthermore coherently use wording such that correlation values  
720 adhere to effect-size conventions as suggested by Cohen (1988) which we hope now overall improved  
721 the consistency in which we discuss results and their respective effect.

722

723 *Discussion p.20, ll 664*

724 *“To support the evidence of our first endocrine analysis, we added a second, independent one.*  
725 *We show that the differences that we systematically observe between males and females present*  
726 *moderate overlap with areas of elevated expression levels of sex hormone related genes. This offers a*  
727 *translation of a recent rodent study to humans, where sex differences in brain structure occurred*  
728 *particularly in regions enriched in sex hormone genes<sup>93</sup>, and furthermore yields the second piece of*  
729 *evidence that sex hormones contribute to sex-bias in human intra-cortical microstructure with a*  
730 *completely independent hormonal analysis. [...]*

731 *Importantly, while our analyses demonstrate a general link between sex-hormone specific*  
732 *genes and microstructural skewness, gene specificity for sex steroid synthesis and sex hormone*  
733 *receptor genes, and account for auto-correlations, the links to individual hormones were not significant*  
734 *at an FDR threshold. [...]*”

735

736 We furthermore now address the overlap between cerebrovasculature with sex differences in profile  
737 mean and with hormonal subgroup sex differences for profile mean and the gradient in the discussion  
738 as a limitation of the first hormonal analysis, for example:

739

740 *p. 17, ll.518*

741 *[...] „On the other hand, the combination molecules that determine mean T1w/T2w signal intensity*  
742 *also make it the most prone to confounds, such as transmit bias field effects (Glasser et al., 2022), and*  
743 *sex hormone effects on cerebral fluids. The moderate (but non-significant) overlap between mean*  
744 *T1w/T2w effects with cerebral vein density furthermore might reflect an interaction with the effect of*  
745 *venous blood on T<sub>2</sub>w signals (Sedlacik et al., 2008). Since profile skewness and the microstructural*  
746 *gradient are based on relative variations of T1wT2w, they do not suffer from the same limitations.“*

747

748 *p.23, ll.749*

749 [...] To limit these uncertainties, we firstly included intracranial volume as a covariate in each of our  
750 linear models, statistically controlling for hormone-induced volume fluctuations; and secondly, we  
751 quantified the overlap between cerebral vasculature and the areas in which identified sex difference  
752 effects. The correlation with hormonal mean T1w/T2w profile, but not skewness supports the notion  
753 that T1w/T2w signal may indeed be globally modulated by the effect that sex hormones exert on  
754 water-balance and lipid metabolism.

755

756

757 **(8) Discussion. Line 420 “The male cortex was characterized by ...” This suggests a typology (which**  
758 **the authors carefully push back against themselves in authors note) so should be reworded.**

759

760 Thank you for pointing out our blind spots, it is extremely important to us to avoid these wordings.

761 We changed it to: p. 17, ll.514

762 “[...] We found systematic differences in all three microstructural measures when dividing the group  
763 into self-reported males and females. First, we found the average T1w/T2w signal intensity to be higher  
764 in the largest part of the male cortex, except for bilateral insular and medial temporal areas [...]”

765

766 **Minor Comments:**

767

768 **(1) Line 246, should cortex-wide averaged high estr female-male = -0.12846 be high progesterone**  
769 **female-male?**

770

771 Yes, the first value is for low estrogen, the second for high progesterone. We corrected the typo in the  
772 manuscript.

773

774 “This was especially evident for females who were estimated to have low estrogen or high  
775 progesterone levels at the time point of imaging (cortex-wide average  $d_{low\ estr\ females - males} = -$   
776  $0.1176$ ; cortex-wide average  $d_{high\ prog\ females - males} = -0.12846$ ).”

777

778 **(2) Line 250, We found that sex differences in the cingulate cortex, the insula, the orbitofrontal**  
779 **cortex and the hippocampus were most affected by the menstrual cycle phase and exogenous sex**  
780 **hormone intake (Figure 3C). It is hard to see these regional differences from three comparisons side-**  
781 **by-side in Figure 3C. Just a suggestion, running a separate anova model in females alone, a F test**  
782 **map of group effect in either all five subgroups or the three groups in Figure 3C (taking OC, low**

783 **estrogen, and high progesterone) across 400 parcels may help to illustrate region variations in the**  
784 **menstrual cycle phase.**

785

786 We indeed now include an additional within-females analysis, which we add to Figure 3. We hope that  
787 the updated Figure 3 (see page 18) addresses this comment.

788

789 **(3) The display of labels in Supplemental Figure 4 seems off, like FDR corr. Cohen's d for contrast**  
790 **Men vs high estr, fo.**

791 All supplementary figures have been corrected.

792

793 **(4) In Supplemental Table 5, it is surprising to see Pspin < P for spatial correlations between gene**  
794 **expression and sex differences in three metrics. I would expect spin tests are more stringent,**  
795 **yielding larger Pspin values.**

796

797 Thank you for this comment. Our previous notation was misleading: if no spin-test was computed, the  
798 table indicated '0' for the p-spin of the respective measure. To avoid confusion, we now emptied these  
799 fields in the supplementary table and added in our methods-section that we compute spin-  
800 permutation distributions for *“for every correlation value that has a lower uncorrected p-value than*  
801 *0.05.”*

802

803 **(5) Line 372, We found that sex-differencers should be sex-differences.**

804 Thank you. Adjusted.

805

806 **(6) Line 428. Typo “the combination molecules”.**

807 Thank you. Adjusted to:

808 *“On the other hand, the combination of molecules that influence mean T1w/T2w also make it the most*  
809 *prone to confounds, such as transmit bias field effects 78, and sex hormone effects on cerebral fluids”*

810

811 **(7) Line 430. Typo “moderate overlap mean T1w/T2w effects”**

812 Thank you. Adjusted to:

813 *“The moderate overlap of mean T1w/T2w effects with cerebral vein density furthermore might be an*  
814 *interaction with the effect of venous blood on T<sub>2</sub>w signals<sup>79</sup>.”*

815

816 **(8) Line 524 - should be “large” rather than “big”**

817 Thank you. Adjusted to:

818 *“However, since we benefit from a large sample size and a second, independent hormonal analysis,*  
819 *our results underscore the importance of moving beyond a generalized understanding of sex*  
820 *differences and considering hormonal profiles as a crucial factor in interpreting and explaining these*  
821 *differences.”*

822

823 **Reviewer #2 (Remarks to the Author):**

824

825 **This article analyzes the cross-sectional MRI images of 992 young subjects from the Human**  
826 **Connectome Project. It calculates regional variation in cortical microstructure based on the T1/T2**  
827 **ratio and analyzes how these metrics differ based on sex and menstrual phase (using self-reported**  
828 **days since menstruation). The authors also assess the spatial correspondence of MRI-derived maps**  
829 **with ex-vivo maps of sex hormone receptor gene expression.**

830

831 We thank the Reviewer for the appreciation of our work and the insightful comments, which we have  
832 addressed below.

833

834 **Although the results are very interesting, we have the following concerns:**

835

836 **The most important concern is that, although the authors state in the discussion that "It is important**  
837 **to note that instead of longitudinally following microstructural changes associated with hormonal**  
838 **variations within individuals, we computed inter-individual contrasts based on an indirectly**  
839 **approximated correlative hormonal measure. Therefore, we interpret our results as tendencies that**  
840 **highlight the importance of considering the complexity of hormones in the study of brain structure.**  
841 **However, due to our large sample size and a second, independent hormonal analysis, our results**  
842 **emphasize the importance of moving beyond a generalized understanding of sex differences and**  
843 **considering hormonal profiles as a crucial factor in interpreting and explaining these differences",**  
844 **the abstract and the paper are full of terms such as "influence of sex hormones (conclusion)" or**  
845 **"endocrine neuroplasticity". This can lead to an over-interpretation of the results. We suggest that**  
846 **the abstract and conclusion clearly reflect the cross-sectional nature of the MRI data and the**  
847 **absence of hormonal measures, and avoid terms such as "influence of sex hormones", "endocrine**  
848 **plasticity", etc., when discussing their own data.**

849

850 Thank you for this comment. We revised the manuscript in a manner that avoids wording which  
851 implies influence and causality, and underlines the correlative and indirect manner of the analyses  
852 more. We now avoid words that imply causality, don't refer to our results as influence of hormones  
853 on brain structure or as endocrine plasticity, and added limitations where necessary. We adjusted our  
854 framing of the study such that we aim to contextualize sex differences, rather than investigate  
855 'endocrine plasticity'. We marked these changes in the revised manuscript. Here are a few examples  
856 of our adjustments of a more careful phrasing:

857

858 Abstract:

859 “[...] Investigating quantitative intracortical profiling in-vivo using the T1w/T2w ratio in 1093 healthy  
860 females and males of the cross-sectional Human Connectome Project young adult sample, we found  
861 that regional cortical and hippocampal microstructure differed between males and females, and that  
862 the effect size of this sex-bias varied depending on self-report hormonal status in females.

863 [...]

864 Albeit correlative, our study underscores the importance of incorporating sex hormone variables into  
865 the investigation of brain structure and plasticity“

866

867 Introduction:

868 “To understand the source of systematic structural variations and its implications, it is crucial to further  
869 contextualize observed sex-differences, going beyond a sex binary. [...] Out of these, activational sex  
870 hormone levels have a particularly strong and dynamic effect on influencing a sex-specific phenotype  
871 (Blencowe et al., 2022; Gegenhuber et al., 2022; Rehbein et al., 2021; Romeo et al., 2004; de Castilhos  
872 et al., 2008, Arnold & Breedlove, 1985; ...). In an effort to bridge traditional neuroanatomy and  
873 neuroimaging, we here investigated sex differences in intracortical microstructure in-vivo based on the  
874 ratio of T1- over T2 weighted (T1w/T2w) MRI intensities, and how these sex differences could be  
875 systematically linked to gonadal hormones specifically.”

876 [...]

877 “There has not been a characterisation of human cortical microstructure sex differences in  
878 vivo, and it remains elusive if sex hormones might play a role in these variations.”

879 [...]

880 “We then contrasted these microstructural measures between females and males, tested how these  
881 sex-differences vary if systematically comparing males with females of particular hormonal profiles  
882 (approximated by self-reported menstrual cycle phase and OC use) and quantified how these effects  
883 overlap with transcriptomic maps of sex-hormone related genes.”

884

885 Discussion:

886

887 “To put the identified sex-differences into context, we investigated a potential link between these  
888 effects and sex hormones with two orthogonal analyses. We show that sex differences in all  
889 microstructural measures change in effect size or even disappear if males are compared to females of  
890 certain estimated hormonal profiles, while randomly subsampling the male group yields coherent

891 results. This suggests that female sex hormones may play a role in microstructural sex differences in  
892 the human cortex. We furthermore demonstrate that there is a particularly big difference in cortical  
893 microstructure between females who take OC and naturally cycling females, as supported by  
894 significant within-females effects.”

895

896 “Similarly, despite moderate correlation effect sizes, none of the transcriptomic map results remain  
897 significant at a FDR-threshold. We thus merely interpret our results as tendencies which underline the  
898 importance of considering the complexity of hormones in the study of brain structure. However, since  
899 we benefit from a big sample size and thoroughly analyzed the microstructural sex differences with  
900 two independent hormonal analyses, we stress the importance of moving beyond a simple binarized  
901 understanding of sex differences and towards considering hormonal plasticity effects as crucial factors  
902 when investigating brain structure. “

903

904

905 “In this study, we investigated if sex-biases in three microstructural cortical measures- an average  
906 measure of cortical microstructure, a proxy for laminar differentiation within the cerebral cortex and  
907 the microstructural gradient - could be linked to sex-hormones, with two complementary relative  
908 analyses in a large cross-sectional sample.”

909

910

911

912 **Introduction:**

913 **We believe that the writing of the paper would benefit from narrowing and focusing the**  
914 **introduction, especially if this article is intended to be directed to the readers of a broad-scope**  
915 **journal such as Nature Communications. Along the same line, we believe that the introduction**  
916 **would benefit if the authors explain the biological interpretation of the extracted brain metrics to**  
917 **make it more accessible to a non-expert scientific audience.**

918

919 Thank you for giving us the chance to convince the audience of the value of our manuscript with a  
920 more narrowed and focused introduction. The major adjustment we made is the first paragraph,  
921 where we are trying to slowly introduce the audience to the topic, incorporating the previously  
922 mentioned more careful framing of the role of gonadal hormones. We furthermore re-ordered the  
923 following paragraphs, starting with an introduction to the brain metrics to make it more accessible to

924 a non-expert scientific audience. Here, we paste the major changes. Please refer to the updated  
925 manuscript for the complete introduction.

926

927 *“Determining sex and gender differences in brain structure is of great societal interest to ultimately*  
928 *improve diagnostics and treatment of brain-related disorders. While macro-scale morphometrical sex*  
929 *differences are well documented, intracortical microstructural differences between sexes have not yet*  
930 *been characterized. To understand the source of systematic structural variations and its implications,*  
931 *it is crucial to further contextualize observed sex-differences, going beyond a sex binary. Underlining*  
932 *the overly simplified nature of a sole division into a self-reported sex-binary, sex differences are*  
933 *determined by a complex combination of societal and epigenetic factors (McCarthy et al., 2009; Ratnu*  
934 *et al., 2017), sex chromosomes (Liu et al, Ratnu et al) and gonadal hormones (Barha & Galea, 2010;*  
935 *Been et al., 2022; Cooke & Woolley, 2005; Hara et al., 2015; Patel et al., 2013; Woolley & McEwen,*  
936 *1993). Out of these, activational sex hormone levels have a particularly strong and dynamic effect on*  
937 *influencing a sex-specific phenotype (Blencowe et al., 2022; Gegenhuber et al., 2022; Rehbein et al.,*  
938 *2021; Romeo et al., 2004; de Castilhos et al., 2008, Arnold & Breedlove, 1985; ...). In an effort to bridge*  
939 *traditional neuroanatomy and neuroimaging, we here investigated sex differences in intracortical*  
940 *microstructure in-vivo based on the ratio of T1- over T2 weighted (T1w/T2w) MRI intensities, and how*  
941 *these sex differences could be systematically linked to gonadal hormones specifically.*

942 *Human brain structure is most commonly characterized in-vivo by determining the macro-*  
943 *scale morphometry of the cortex. Analyses of volume- or thickness- variations based on the inner and*  
944 *outer cortical boundaries, however, are blind to microstructural variations within the cortical sheath.*  
945 *Microstructural changes within the cortical sheath are traditionally examined post mortem using cell-*  
946 *staining procedures<sup>43-45</sup>. On this micro-level, the human cortex is structured into several cell layers.*  
947 *The amount and prominence of each layer as well as the sharpness of their boundaries varies across*  
948 *the cortex, so that cortical areas can be classified into different types according to their laminar*  
949 *elaboration<sup>44,46,47</sup>. These variations in cortical types are systematically linked to the cortex' inherent*  
950 *property of plasticity<sup>46,48</sup>, such that simpler laminar structures (e.g. paralimbic structures) are*  
951 *hypothesized to be more plastic than highly elaborate areas (e.g. primary visual cortex)<sup>48,49</sup>. Amongst*  
952 *others, one explanatory factor for this covariation of laminar differentiation with plasticity is the*  
953 *amount of intracortical myelin, which inhibits plasticity in the brain<sup>50-55</sup>. Intracortical myelin content*  
954 *correlates with laminar differentiation so that more elaborate laminar architecture is characterized by*  
955 *higher intracortical myelin content and higher stability<sup>48,56</sup>. Lastly, gradients of microstructural*  
956 *variation running along major axes of organization in the cortex support variation in brain function<sup>57-</sup>*  
957 *<sup>59</sup>. Multiple neuroanatomical accounts have illustrated the intrinsic link between microstructural*



958 *properties, inherent brain organization principles, and brain function* <sup>39-42</sup>. Thus, examining variations  
959 *in i) microstructural tissue properties, ii) cortical lamination and iii) the microstructural inter-regional*  
960 *organization in-vivo will yield a more specific understanding of sex differences in brain structure.*

961 [...]

962

963 **Methods:**

964 **We recommend authors to include the Freesurfer-derived Euler Number as an additional covariate**  
965 **in the models, along with intracranial volume, age, and sex, to control for motion-related data**  
966 **quality.**

967

968 Thank you for this suggestion. We added the euler number as a covariate in our analysis which did not  
969 change our results. We marked this in the methods:

970

971 **Methods, p. 29, ll. 886**

972

973 *"Since the microstructural measures exhibit small to moderate correlations with intracranial volume*  
974 *(ICV, see supplementary figure 10), in each model we accounted for ICV, as well as age and the euler*  
975 *number as a movement-related data quality measure:*

976 *T1w/Tw2 measure (parcel) ~ b0 \* 1 + b1 \* sex + b2 \* age + b3 \* ICV + b4 \* euler\_no"*

977

978 **We believe that authors should provide a clearer description of how they categorize the groups of**  
979 **interest, specifically females and males. The authors explain the criteria for classifying the female**  
980 **category (self-reported as females and being or having been menstruating), but they do not specify**  
981 **how they classify males. We assume that the male categorization follows the same logic as the**  
982 **female category (self-reported as males and not menstruating), leaving outside other categories**  
983 **(self-reported as females and not menstruating or self-reported as males and being or having been**  
984 **menstruating), but this should be explicitly stated. Also, authors sometimes mix the terms sex**  
985 **(female/male/intersex) and gender (women/men/other genders). For instance, when they define**  
986 **the female category, they state, "We classified individuals of female sex if they self-reported their**  
987 **gender as female and indicated that they are or have been menstruating in their lives." We believe**  
988 **that a more appropriate definition should be: "We classified individuals of female sex if they self-**  
989 **reported their sex as female and indicated that they are or have been menstruating in their lives."**  
990 **Authors should homogenize the use of the terms males/females vs men/women throughout the**

991 **manuscript. We suggest sticking to the male/female categories since this article focuses on sex-**  
992 **specific factors rather than gender.**

993

994 We thank the Reviewers for this remark. We agree that due to the focus on biological sex and the lack  
995 of focus on societal variables, we want to avoid “men” and “women”, and thus homogenized the text  
996 such that we exclusively use the words “males” and “females”.

997 Our grouping in male and females followed the two items collected in the HCP dataset: One of their  
998 items is “gender” - a binary self-report of ‘female’ and ‘male’; another item is ‘menstrual age began’.  
999 We used a combination of the item the HCP authors call ‘gender’ with ‘menstrual age began’ to divide  
1000 the sample into what we term ‘sex’. There were no individuals who self-identified as male and  
1001 menstruated. In our methods section, we add the following clarification:

1002

1003 Methods, p. 26, from ll. 778:

1004 *“We classified those individuals as females who reported a female gender and are or have been*  
1005 *menstruating in their lives, and all others as male. Note that all datasets collected in this study fall into*  
1006 *one of these two categories, but that we distance ourselves from a sex- and gender-binary. We*  
1007 *speculate that a more precise classification into gender and sex might lead to re-classification of some*  
1008 *individuals, and take this into account as a source of random noise.”*

1009

1010 Please also note our footnote on p.3:

1011 *“In this manuscript, the terms ‘female and male sex’ refers to a combination of self-reported binary*  
1012 *gender and the report of having menstruated in one’s life. The authors appreciate the complexity of*  
1013 *biological sex and the influence of gender on biology, and do not postulate a sex binary. “*

1014

1015

1016

1017 **If we understand correctly, the authors are parcellating the cortex into 12 sections. However, this**  
1018 **parcellation is based on the information provided by approximately 4 voxels (as estimated by the**  
1019 **voxel size of HCP images and the mean cortical thickness). We assume that the authors might have**  
1020 **interpolated some of the values. In the same line, is the number of voxels different depending on**  
1021 **the orientation of the perpendicular line used to calculate the layers? How does this might affect**  
1022 **the calculated metrics, especially the skewness?**

1023

1024 Yes, the Reviewer is correct: the microstructural measures used in this study do rely on interpolation  
1025 of data points (similar to classical histological analyses, albeit this field is in need of down-sampling),  
1026 which is a clear limitation of our study. However, the approach has been previously successfully  
1027 validated in an ultra-high resolution ex-vivo histological dataset, recovering highly consistent brain  
1028 maps based on quantitative microstructural profiling in MRI and histology (Paquola et al., 2019 PLOS).  
1029 Moreover, we take a parcellation approach and that is naive to the structure of the cortex, but rather  
1030 is based on local and global functional organization. Yet irrespective of this, it is possible that the  
1031 number of voxels may impact the skewness, yet the number of voxels included randomly varies across  
1032 the cortical mantle due to the curved shape of the human cortex. Moreover, maps of skewness look  
1033 fairly smooth and we furthermore don't have reason to expect that potential problems arising with  
1034 the interpolation may bias males and females in diverging ways and thus in the context of the current  
1035 study, we interpret this as a factor of random noise.

1036

1037 We add the following sentence to our **discussion, p. 17, from ll. 479:**

1038

1039 *"This approach has been inspired by traditional cyto- and myeloarchitectonic metrics. While it requires*  
1040 *interpolation of data points in the cortical sheath cross section, it has previously been validated with*  
1041 *an ultra-high resolution cytoarchitectural ex-vivo dataset (Paquola, Wael, et al., 2019). We first [...]"*

1042

1043

1044 **Discussion:**

1045

1046 **One strong point of the article is that it detects sex differences in brain structure when grouping**  
1047 **individuals into the female-male categories. However, when dividing females into the five sub-**  
1048 **group categories, these sex differences only replicate in the OC users. We believe this should be**  
1049 **further discussed and treated as one of the main results of the article, especially since the authors**  
1050 **disclose at some points that studies that merely test sex differences are over-simplistic and that**  
1051 **considering sex-specific factors such as hormonal levels is essential.**

1052

1053

1054 We thank the reviewer for this suggestion. In fact, all reviewers had comments about this part of the  
1055 paper, offering several ideas on how to make the results easier to interpret, and how to underline its  
1056 importance. We now take a step-wise approach to interpret these findings and discuss them  
1057 appropriately:

- 1058 - as before, create subgroups and repeat male vs. female contrast only considering subgroups  
1059 of females
- 1060 - check consistency by randomly subsampling males and repeating the analysis
  - 1061 - create an average effect over all parcels, and with ANOVA check if *on average* the  
1062 effect-size changes between subgroup GLMs
  - 1063 - on a regional level, report in which parcels we observe variations in effect size
- 1064 - create a between-female subgroups contrast to explain why sex-difference effect size changes  
1065
- 1066 We discuss these results both in relation to the sex-differences and hormonal grouping, add more  
1067 explanation and dive deeper into the details and interpretation of this result, such that its overall  
1068 importance is further underscored in the text.
- 1069
- 1070 Updated results figure:

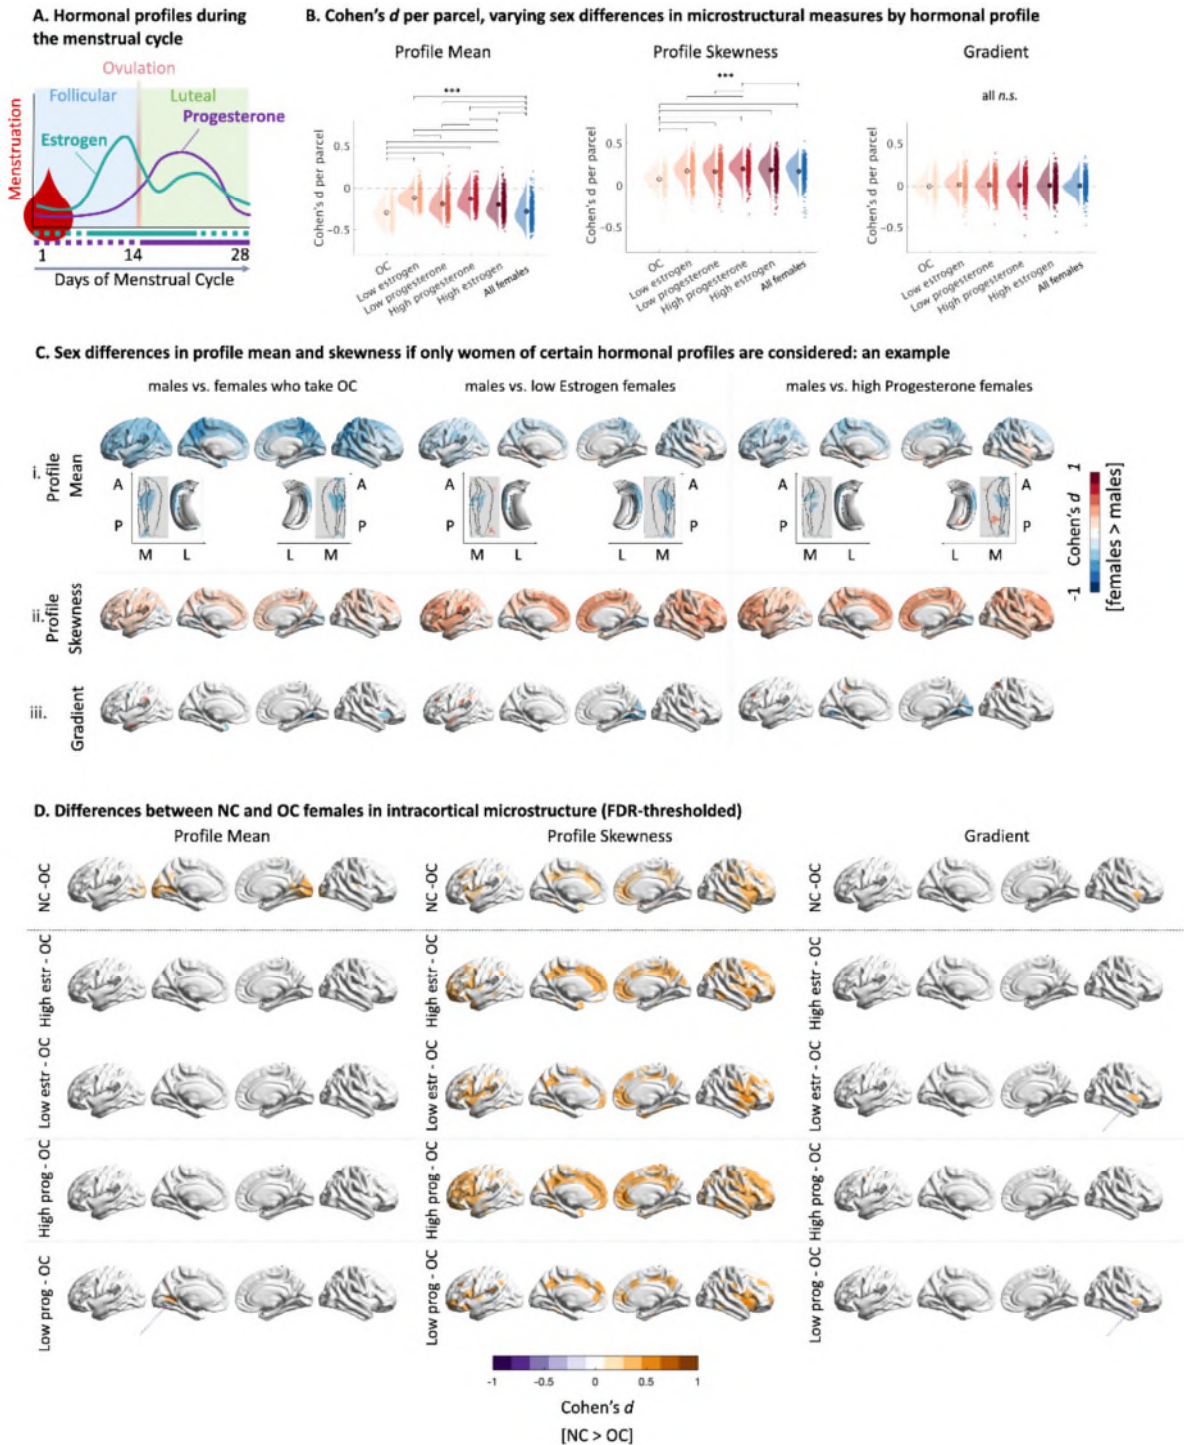

1071

1072

1073

1074

1075

1076

1077

1078

1079

1080

1081

**Figure 3. Comparing males to different female sub-samples, grouped by menstrual cycle phase.** (A) Estrogen and progesterone fluctuate with the menstrual cycle. Horizontal lines under the x-axis indicate grouping: purple reflects progesterone (dotted = low; solid = high); turquoise reflects estrogen (dotted = low; solid = high) (B) Hormones determine cortex-wide sex-difference effect sizes based on post-hoc contrast on cortex-wide effect sizes. Cohen's  $d$  per parcel is plotted separately for the three intracortical measures profile mean, profile skewness and the gradient, respectively for each subgroup-comparison. All shown contrasts were significant ( $p < .001$ ). (C) FDR-thresholded Cohen's  $d$  maps of T1w/T2w profile mean (i) between males and subsamples of females divided by OC use and menstrual cycle phase projected on the cortical surface and the hippocampus. (ii) FDR-thresholded Cohen's  $d$  maps of T1w/T2w profile skewness between males and female subsamples mapped on the

1082 cortex. (iii) FDR-thresholded Cohen's d map of differences in the microstructural gradient between  
1083 males and different female sub-samples. For completeness, all other FDR-thresholded Cohen's d maps  
1084 (all group-comparisons, for each of the three measures) are plotted in supplementary figure 4. D)  
1085 Microstructural differences between female groups, comparing OC females with all NC females, as well  
1086 as OC females with specific NC subgroups, divided by their hormonal period. Columns are the three  
1087 microstructural measures T1w/T2w mean, T1w/T2w skewness, and the microstructural gradient.  
1088 Purple areas are parcels which had significantly higher values for OC females, orange had significantly  
1089 higher values for NC females after FDR-thresholding (all Cohen's d).

1090

1091

1092

1093 Discussion:

1094

1095 “We found that the cortical microstructure of males and females differ regionally in each of these  
1096 microstructural measures. The effect size of the observed sex-differences depended on the estimated  
1097 estrogen and progesterone levels of females at the time of the brain scan. In particular, we observe  
1098 systematic differences between NC and OC females in all three microstructural measures. We  
1099 furthermore find that the measure of microstructural skewness, being a proxy measure of laminar  
1100 differentiation, proves particularly robust for several control analyses, and furthermore spatially  
1101 overlapped with expression levels of sex-hormone-relevant genes.”

1102

1103 “In contrast to the mean microstructural intensity, the sex-difference effect in microstructural  
1104 skewness was driven by NC females, while OC females exhibited profiles more similar to males. The  
1105 low estrogen, low progesterone, and high estrogen groups all replicated the initial sex difference in the  
1106 dominance of higher versus lower cortical compartments intensity. However, the effects were different  
1107 from the main effect when examining females who regularly took oral contraceptives or had high  
1108 progesterone concentrations. Specifically, there was nearly no difference in lamination between males  
1109 and females who took OC (weak average effect), but there was an even stronger average difference in  
1110 lamination between males and females with high progesterone concentrations. OCs suppress  
1111 circulating estradiol and progesterone levels<sup>84-86</sup>. Though no study to date has investigated such  
1112 effects, we draw analogies between a recent morphological study focussing on the medial temporal  
1113 lobe and its link to progesterone as well as chronic progesterone suppression (such as OCs): here  
1114 progesterone was shown to shape MTL volume throughout the menstrual cycle, and ceases to do so  
1115 when suppressed<sup>87</sup>. Speculatively, this effect might appear through progesterone's effect on  
1116 myelination<sup>88-90</sup>. The variations we observed were mainly driven by stronger effects in the prefrontal,  
1117 anterior cingulate and tempo-parietal areas, which are explained by robust differences in skewness in  
1118 these areas between females who take OC and any NC female subgroup, but most strongly the high  
1119 progesterone and high estrogen groups. This suggests that effects of oral contraceptives specifically

1120 *contribute to a reduction or exacerbation of depth varying microstructural intensity, making this*  
1121 *microstructural feature in OC females more similar to males. The strong hormone-related lamination*  
1122 *effect is particularly interesting when considering the fact that estrogen receptor expression is highly*  
1123 *depth-specific, and particularly pronounced in the deeper cortical layers (V and IV<sup>91</sup>). Behaviourally*  
1124 *relevant sex hormone-related spiking pattern changes also are layer-specific particularly pronounced*  
1125 *in deeper cortical layers<sup>92</sup>, potentially driving structural plasticity.*

1126 *[...]”*

1127

1128

1129

1130 **Reviewer #3 (Remarks to the Author):**

1131 **The authors interrogated microstructural differences in the context of sex and menstrual cycle**  
1132 **phase on three distinct levels, providing a novel account of sex-specific cytoarchitectural profiles in**  
1133 **the brain. I am excited by this work, beautifully executed, and offer several insights that may**  
1134 **improve its impact.**

1135

1136 We thank the Reviewer for the appreciation of our work and the insightful comments, which we have  
1137 addressed below.

1138

1139

1140 **1. Given the age distribution of the sample (22-37), I wonder if the authors considered potential**  
1141 **influences of perimenopause (I have seen females of their mid to late 30s in this stage before,**  
1142 **though rare) and/or possible endocrine conditions (e.g., PCOS, history of hysterectomy, etc) that**  
1143 **may have impacted hormonal levels. It would be important to at least report the lack of this**  
1144 **information for the sake of transparency on potential heterogeneity of the sample, in terms of**  
1145 **female hormone concentrations.**

1146

1147 This is an important point. The only information available to us was if individuals had a regular  
1148 menstrual cycle, and if they were within a 28 day window of menstruation. We excluded those that  
1149 report recent pregnancy, IUDs, hysterectomy, endometriosis and similar conditions. In the methods,  
1150 we state:

1151

1152 *Methods, adjustment; p. 29 ll.932:*

1153 *“We included all females who reported regular menstrual cycles, and that their last menses was*  
1154 *between 0 and 28 days (n = 284), which is considered the length of a normal menstrual cycle 26.*  
1155 *Unfortunately, the current sample did not have information about perimenopausal staging or possible*  
1156 *endocrine conditions, posing a potential source of noise.”*

1157

1158 We further add that studies with direct hormonal samples, if possible, at several densely sampled  
1159 timepoints should follow this work to further advance research on female health and gonadal  
1160 hormones.

1161

1162 *Discussion, addition, p. 21, ll. 669*



1163 *"We also limited the analysis to individuals that report having a regular menstrual cycle, while*  
1164 *ignoring perimenopausal hormonal changes as well as other endocrine conditions."*

1165

1166 **2. On a similar note, it would be useful to clarify the criterion of those that "are or have been**  
1167 **menstruating in their lives" - Was this explicit to those currently menstruating at the time of the**  
1168 **study on a regular basis, or could some females who have not menstruated for months or years on**  
1169 **end, but at some point in their lives (as suggested by this criterion), have been included? If so, that**  
1170 **could certainly skew the hormonal distribution of the sample.**

1171

1172 In this study, we used the HCP dataset which collected a broad range of items. One of their items is  
1173 "gender" but is operationalised as a binary self-report of 'female' and 'male'; another item is  
1174 'menstrual age began'; another item is 'regular menstrual cycle'. To account for the biological  
1175 implications of sex (vs. gender), we used a combination of the item the HCP authors call 'gender' with  
1176 'menstrual age began' to divide the sample into what we term 'sex'. In the second part of our paper,  
1177 we fine-tune our definition such that we include only individuals classified as 'females' who take OC  
1178 into one group; and only individuals who report a regular menstrual cycle and who have previously  
1179 been identified as 'females' to then generate the hormonal groupings. We thus hope to use a valid  
1180 estimate for our grouping, but recognise and underscore in the text that this is a rough, correlative  
1181 estimate which only gains validity through its big sample size and additional transcriptomic analysis.  
1182 We highlight these limitations as follows:

1183

1184 Methods, p. 28, ll. 915:

1185 *"We used self-reported days since menstruation from the day of the scan and about regular*  
1186 *OC intake as a grouping variable."*

1187  
1188  
1189  
1190  
1191  
1192  
1193  
1194  
1195  
1196  
1197  
1198  
1199  
1200  
1201  
1202  
1203  
1204  
1205  
1206  
1207  
1208  
1209  
1210  
1211  
1212  
1213  
1214  
1215  
1216  
1217  
1218  
1219

Discussion, p.21 ll 670

*“To provide more robust evidence for a link between gonadal hormones and microstructure, it will be important to follow pioneering macro-scale studies in the future that investigate densely sampled intra-individual hormonal fluctuations as measured by blood-tests and to take both male and female hormonal diurnal fluctuations into account. Such studies will further help understand the association between the anatomy of the brain and hormonal variation and potentially functional consequences.”*

**3. Regarding the inclusion of a subset of females using OC - More details regarding the type of birth control (estrogen only, progesterone only, or combination), the length of exposure (being mindful of any who have recently started OC and may, therefore, still be adjusting), and the like is needed, considering that these variables play a significant role in the efficacy of OC. I would also encourage the authors to be as explicit as possible when discussing past literature about the effects of OC - For instance, lines 69-71 on page 3 could use more detail (i.e., type of OC, length of OC exposure, age and menopausal status of the sample). In sum, what is meant by "regular" OC?**

We are currently grouping every female in this group who indicated ‘yes’ for the question ‘Is the participant using birth control pills, progesterone, or fertility drugs? Yes = 1, No = 0 (Asked of female participants only)’. There is a more fine-grained item which asks “Menstrual\_BirthControlCode - What birth control, progesterone, or fertility drugs is the participant using? 1=OC's for contraception, 2=OC's primarily for menstrual regulation, 3=estradiol for menstrual regulation, 4=progesterone for menstrual regulation, 5=fertility therapy, 6=other, 7=unknown (Asked of female participants only)

“; however, all participants answer with ‘OCs for contraception’. We agree that again, this way of grouping is imprecise and does not account for the complexity of this topic. Unfortunately, we are limited by the sample we have and tried the best we could with the data available. To make this limitation more transparent for the reader, we add the following to our **discussion, p. 20, from ll. 649:**

*“We acknowledge the extreme simplification for both NC and OC females, where we ignored the specific hormonal formulation of the pill and the initiation and duration of use due to a lack of data.”*

1220 **4. It would also be beneficial to expand on the cross-sectional limitations of this study as baseline**  
1221 **hormone levels were not acquired from females. Though there is a "usual range" which we might**  
1222 **expect reproductive females to fall within in terms of hormone levels at each menstrual stage, what**  
1223 **is "normal" for these instances can vary across individuals. Though cross-sectional work is still very**  
1224 **informative, a thorough acknowledgement of this limitation, especially in the context of this study,**  
1225 **is lacking.**

1226

1227 We agree and add this limitation to our discussion, and further underline the cross-sectional character  
1228 of our study in the abstract to inform all readers about the limitations of this study:

1229

1230 **Abstract**

1231 *"[...] We assessed regional variation in cortical microstructure as a function of sex, hormonal status*  
1232 *and sex hormone receptor gene expression distribution based on quantitative intracortical profiling in*  
1233 *vivo using the magnetic resonance imaging based T1w/T2w ratio in 992 healthy females and males of*  
1234 *the **cross-sectional** Human Connectome Project young adult sample.*

1235 *[...]*

1236 *Together, our data thus are suggestive of sex differences in cortical and hippocampal microstructure,*  
1237 *as well as **a link of sex hormones with these differences. Albeit correlative,** this study underscores the*  
1238 *importance of incorporating sex hormone variables into the investigation of brain structure and*  
1239 *plasticity. "*

1240

1241 We also suggest that future work should work intr-individually and with direct blood-samples rather  
1242 than correlative measures.

1243

1244 **Discussion, p.21 || 670**

1245 *"To provide more robust evidence for a link between gonadal hormones and microstructure, it will be*  
1246 *important to follow pioneering macro-scale studies in the future that investigate **densely sampled***  
1247 ***intra-individual** hormonal fluctuations as measured by **blood-tests** and to take both male and female*  
1248 *hormonal diurnal fluctuations into account."*

1249

1250

1251 **5. Was the time of day held consistent across subjects when collecting hormone information? Were**  
1252 **hormones also measured in the males? I wonder if diurnal testosterone fluctuations in males might**  
1253 **have an influence on the current results.**

1254

1255 There were no direct hormone measures in this dataset. We derive an indirect hormonal measure by  
1256 roughly dividing females into times judged by self-reported menstrual cycle that is generally  
1257 characterized by ‘higher’ and ‘lower’ progesterone and estrogen levels. We, however, agree that this  
1258 would be a valuable addition and thus add the following to our **discussion, p. 20, from II. 652:**

1259

1260 *“To provide more robust evidence for a link between gonadal hormones and microstructure, it will be*  
1261 *important to in the future follow pioneering macro-scale studies that **investigate densely sampled***  
1262 ***intra-individual hormonal fluctuations** as measured by blood-tests and to take both male and female*  
1263 ***hormonal diurnal fluctuations into account.**”*

1264

1265 We did, however, add a control analysis in which computed the contrast between the female  
1266 subsamples and 1000 permutations of randomly sampled groups of males. While this does not  
1267 account for systematic diurnal changes in testosterone, we show that the effects exhibit the same or  
1268 larger consistency values as the main sex-difference analysis, if different groups of males are  
1269 considered.

1270

**Internal consistency - male sample, hormonal contrasts.**

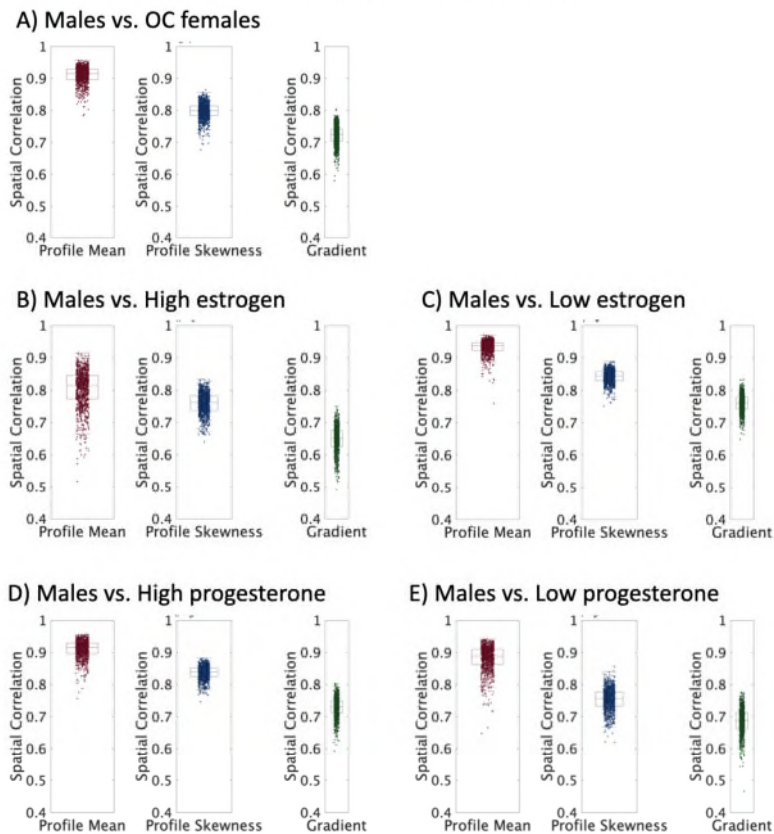

1271

1272 *Supplementary Figure 7. Split-correlation of 1000 random permutations for all hormonal contrasts and*  
1273 *each microstructural measure. For every split, we computed the contrast between males and females,*  
1274 *randomly choosing only a subsample of males, such that  $n(\text{males}) = n(\text{females})$ . We then computed*  
1275 *the internal consistency for this randomly chosen male subsample by correlating the effect sizes of this*  
1276 *contrast with the Cohen's  $d$  effect sizes of an equally sized and randomly chosen subsample of males.*  
1277 *Datapoints represent correlation values for each split.*  
1278

1279

1280

1281 **6. Relatedly, were the hormonal assessments, MRI, and menstrual questions completed within the**  
1282 **same day? Or could a few females have transitioned to a different menstrual phase over the course**  
1283 **of data collection?**

1284

1285 Yes, MRI and menstrual cycle assessments were acquired within the same day (Van Essen et al., 2013;  
1286 Supplemental Table S2, first visit).

1287

1288 We adjusted the methods, **p. 28 ll. 922** as follows:

1289 *"We used self-reported days since menstruation from the day of the scan and about regular OC intake*  
1290 *as a grouping variable."*

1291

1292

1293

1294 **7. I also wonder if comparisons within females, between the various stage-associated subgroups,**  
1295 **might be useful to further interpret the results presented here. If no variations between female**  
1296 **groups are found, this may be attributed to the over-generalization of hormone levels by stage**  
1297 **rather than on an individual or change-from-baseline degree. If variations are found, however, this**  
1298 **could corroborate the authors' grouping approach.**

1299

1300 Thank you for this suggestion. We added an additional analysis in which we show that in particular OC  
1301 and NC females differ in their microstructural features. We found systematic differences between OC  
1302 and NC females, but not between any other group. We add this finding to our results and adjust the  
1303 discussion section accordingly. Since all reviewers had comments about this section, we adjusted the  
1304 text significantly. To not artificially blow-up this response letter, please refer to the updated result and  
1305 discussion section in the manuscript. We added an overview of this analysis into figure 3D:

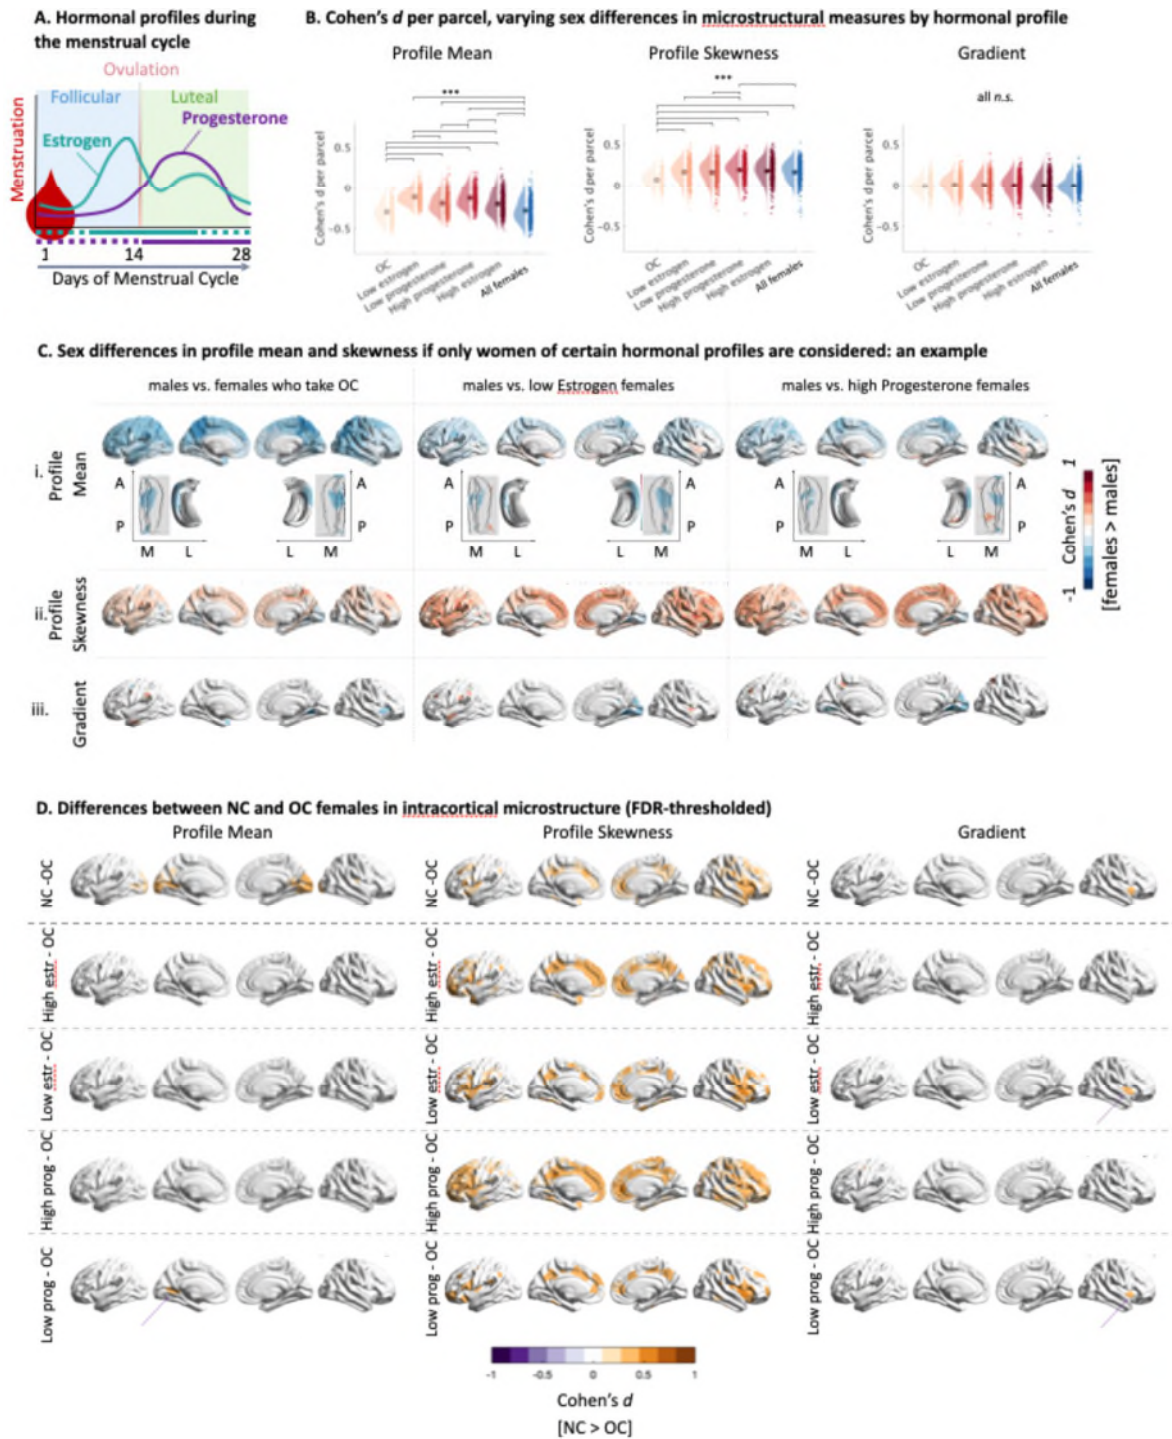

1306

1307

1308

1309

1310

1311

1312

1313

1314

1315

1316

1317

**Figure 3. Comparing males to different female sub-samples, grouped by menstrual cycle phase.** (A) Estrogen and progesterone fluctuate with the menstrual cycle. Horizontal lines under the x-axis indicate grouping: purple reflects progesterone (dotted = low; solid = high); turquoise reflects estrogen (dotted = low; solid = high) (B) Hormones determine cortex-wide sex-difference effect sizes based on post-hoc contrast on cortex-wide effect sizes. Cohen's  $d$  per parcel is plotted separately for the three intracortical measures profile mean, profile skewness and the gradient, respectively for each subgroup-comparison. All shown contrasts were significant ( $p < .001$ ). (C) FDR-thresholded Cohen's  $d$  maps of T1w/T2w profile mean (i) between males and subsamples of females divided by OC use and menstrual cycle phase projected on the cortical surface and the hippocampus. (ii) FDR-thresholded Cohen's  $d$  maps of T1w/T2w profile skewness between males and female subsamples mapped on the cortex. (iii) FDR-thresholded Cohen's  $d$  map of differences in the microstructural gradient between

1318 *males and different female sub-samples. For completeness, all other FDR-thresholded Cohen's d maps*  
1319 *(all group-comparisons, for each of the three measures) are plotted in supplementary figure 4. D)*  
1320 *Microstructural differences between female groups, comparing OC females with all NC females, as well*  
1321 *as OC females with specific NC subgroups, divided by their hormonal period. Columns are the three*  
1322 *microstructural measures T1w/T2w mean, T1w/T2w skewness, and the microstructural gradient.*  
1323 *Purple areas are parcels which had significantly higher values for OC females, orange had significantly*  
1324 *higher values for NC females after FDR-thresholding (all Cohen's d).*  
1325

1326

1327

1328 **8. Regarding the results showing differences between males and high progesterone females, I would**  
1329 **be interested to see a more in-depth interpretation from the authors to offer potential explanations**  
1330 **for this specific finding.**

1331

1332 With the within-female analysis that we added, we hope to provide a better idea of robustness of the  
1333 variations of results that we observe. In fact, we now take a step-wise approach to interpret these  
1334 findings and discuss them appropriately:

- 1335 - as before, create subgroups and repeat male vs. female contrast only considering subgroups  
1336 of females
- 1337 - check consistency by randomly subsampling males and repeating the analysis
- 1338 - create an average effect over all parcels, and with ANOVA check if *on average* the  
1339 effect-size changes between subgroup GLMs
- 1340 - on a regional level, report in which parcels we observe variations in effect size
- 1341 - create a between-female subgroups contrast to explain why sex-difference effect size changes

1342

1343 With this analysis and adjustments raised by other reviewers, we have changed the discussion section  
1344 on the hormonal sub-group comparisons quite a lot. Here we copy the part which focuses on your  
1345 point of interest specifically:

1346

1347 [...]

1348 *In contrast to the mean microstructural intensity, the sex-difference effect in microstructural*  
1349 *skewness was driven by NC females, while OC females exhibited profiles more similar to males. The*  
1350 *low estrogen, low progesterone, and high estrogen groups all replicated the initial sex difference in the*  
1351 *dominance of higher versus lower cortical compartments intensity. However, the effects were different*  
1352 *from the main effect when examining females who regularly took oral contraceptives or had high*  
1353 *progesterone concentrations. Specifically, there was nearly no difference in lamination between males*  
1354 *and females who took OC (weak average effect), but there was an even stronger average difference in*

1355 lamination between males and females with high progesterone concentrations. OCs suppress  
1356 circulating estradiol and progesterone levels (Arnold, Tóth, & Faredin, 1980; Basu et al., 1992;  
1357 Thornycroft & Stone, 1972). Though no study to date has investigated such effects, we draw analogies  
1358 between a recent morphological study focussing on the medial temporal lobe and its link to  
1359 progesterone as well as chronic progesterone suppression (such as OCs): here progesterone was shown  
1360 to shape MTL volume throughout the menstrual cycle, and ceases to do so when suppressed (Taylor et  
1361 al., 2020). Speculatively, this effect might appear through progesterone's effect on myelination (Jung-  
1362 Testas et al., 1994, Koeniget al., 1995, Hussainet al., 2011, Koeniget al., 1995). The variations we  
1363 observed were mainly driven by stronger effects in the prefrontal, anterior cingulate and tempo-  
1364 parietal areas, which are explained by robust differences in skewness in these areas between females  
1365 who take OC and any NC female subgroup, but most strongly the high progesterone and high estrogen  
1366 groups. This suggests that effects of oral contraceptives specifically contribute to a reduction or  
1367 exacerbation of depth varying microstructural intensity, making this microstructural feature in OC  
1368 females more similar to males. The strong hormone-related lamination effect is particularly interesting  
1369 when considering the fact that estrogen receptor expression is highly depth-specific, and particularly  
1370 pronounced in the deeper cortical layers (V and IV; österlund et al., 2000). Behaviourally relevant sex  
1371 hormone-related spiking pattern changes also are layer-specific particularly pronounced in deeper  
1372 cortical layers (Clemens et al., 2019), potentially driving structural plasticity.

1373 [...]

1374

1375

1376 **9. In general, I would also encourage the authors to take a more careful approach with their**  
1377 **discussion of results. The female subgroups may be a bit over-simplified, especially considering the**  
1378 **moderate presence of estrogen in what the authors refer to as only the "high progesterone" stage.**  
1379 **I am very pleased to see a paper that covers this topic, but am eager to see more unique conclusions**  
1380 **that pose important questions while also being mindful of limitations. There is more room for**  
1381 **discussion in this manner.**

1382

1383 Thank you for this suggestion. We agree that we need to be careful and thus adjust the wording in  
1384 particular in reference to this section such that it will be clear to the reader that these results are  
1385 based on rough grouping, correlative, and to be mindful of limitations.

1386 First we explicitly state this fact now in the methods:

1387 “Note however, that progesterone and estrogen groups do overlap due to this classification. “

1388



1389 Second, we don't find significant within-female contrasts between naturally cycling groups. We thus  
1390 now focus more on the NC vs OC contrasts, reducing the impact of the over-simplified hormonal  
1391 classification. (see figure pasted in comment 7).

1392

1393 Third, we updated the limitations in the discussion, and generally adjusted our wording to more  
1394 careful conclusions, for example:

1395

1396 *"[...] This effect was particularly driven by the low progesterone subgroup, extending evidence*  
1397 *from a recent preprint that reports progesterone-related white-matter microstructural and cortical-*  
1398 *thickness variations in the occipital lobe (Rizor et al., 2023). Even though we observed more local*  
1399 *variations in the sex-difference effect-size by hormonal subgroup comparison in the collapse*  
1400 *microstructural measure, these were not strong enough to show in a within-female comparison. We*  
1401 *thus conclude that sex differences in average cortical microstructure are at least partly driven by long-*  
1402 *term OC use; but that here, we did not find robust evidence for short-term cycle dependent variations*  
1403 *in the sex difference effect.*

1404 *[...]*

1405 *It is furthermore important to note that rather than longitudinally following up on*  
1406 *microstructural changes going along with hormonal variations intra-individually or post-mortem tissue*  
1407 *analysis, we computed inter-individual contrasts on an indirectly approximated correlative hormonal*  
1408 *measure. We acknowledge the extreme simplification for both NC and OC females, where we ignored*  
1409 *the specific hormonal formulation of the pill and the initiation and duration of use due to a lack of data.*  
1410 *We also limited the analysis to individuals that report having a regular menstrual cycle, while ignoring*  
1411 *perimenopausal hormonal changes as well as other endocrine conditions. [...]"*

1412

1413

1414 **Reviewer #4 (Remarks to the Author):**

1415

1416 **I co-reviewed this manuscript with one of the reviewers who provided the listed reports as part of**  
1417 **the Nature Communications initiative to facilitate training in peer review and appropriate**  
1418 **recognition for co-reviewers.**

1419

1420 Thank you a lot for your efforts!

1421

1422

Reviewer #1 (Remarks to the Author):

The authors have done a great job in revising their manuscript to respond to comments from our initial review. We would support publication of the manuscript in its current form with minor remaining suggested edits as listed below.

Lines 328-337 in the merged pdf, as there are comparisons for all three metrics (mean, skewness, gradient), please clarify which metric is referred to when the sex difference effect is mentioned.

Line 372 in the merged pdf, r value should be .13 not 13, right?

Lines 386-391, thanks authors for adding this supplemental analysis to quantify the effect of unbalanced male vs. female AHBA donors. The correlations did show a global agreement at least in results of skewness. However, it is worthy of note that male- and female-only results have different signs even in skewness for individual genes like HSD17B8.

Line 388 in the merged pdf, supplement figure 8 should be 9

Reviewer #2 (Remarks to the Author):

Thank you to the authors for carefully addressing all of our concerns and for the significant effort dedicated to enhancing the paper. We are pleased to acknowledge that all our suggestions and doubts have been effectively addressed. At this stage, we have no further comments and are ready to accept the paper for publication.

Reviewer #3 (Remarks to the Author):

I appreciate the authors' revision to this manuscript, which has improved significantly in result. I have responded to each of my initial claims and the authors' rebuttal in order below.

1. I am glad to learn that the authors included exclusionary criteria of "recent pregnancy, IUDs, hysterectomy, endometriosis and similar conditions" to control as best as possible for heterogeneity among the sample. Given that hormones are a central theme of the study and these criteria strengthen the validity of its sample, I would suggest stating directly in the manuscript.
2. Throughout the manuscript, I would reword "females who have been menstruating in their lives" to "females that report menstruation within 28 days of the scan" as this seems to be a more accurate representation according to the authors' response.
3. Thank you for your transparency on the generalization of your OC group and adding a note about this to the limitations.
4. The conclusions drawn from this cross-sectional work are more digestible now that the authors have applied their revisions.
5. Regarding the following statement within the revised manuscript: "We accordingly built a high estrogen group for females who were broadly around ovulation (between day 7 until day 23, n = 284), and a low estrogen group for females that were just before and during menstruation (n = 100). Progesterone surges after ovulation during the luteal phase, and was thus defined as low before day 15 (n = 171), and high after day 14 (n = 113)" - Does this mean that some females were included in multiple groups? Given the substantial overlap between them by days? I would recommend making independent groupings to avoid this.

I am also surprised by the large window for the ovulation/high estrogen group - Two weeks seems too broad. Ovulation typically occurs around day 14, and lasts only a day or two, so the current cutoff is likely grasping other hormonal extremes as well. I appreciate the added analysis by the

authors, but think the classification of female subgroups needs reworking, or at least stronger justification.

Regarding: "to take both male and female hormonal diurnal fluctuations into account" - I would reword this as only males experience noticeable diurnal fluctuations in sex hormones while females fluctuate over the course of 28 days. This sentence makes it sound as though diurnal is in reference to both sexes.

6. Thank you for clarifying this detail.

7. My initial suggestion was to compare female subgroups within those naturally cycling to support the authors' approach to classifying high/low estrogen and progesterone groups. If differences are found between high estrogen NC and low estrogen NC groups, for instance, this would validate their grouping method and provide more credibility for the hormonal differences between them. I appreciate the comparisons between each NC subgroup and the OC group, though would like to see the former as well.

8. The authors have added a thought-provoking discussion on the high progesterone vs. males comparison. This improves the impact and interpretation of results.

9. The claims made in the discussion have been appropriately softened to avoid lofty inferences.

Reviewer #4 (Remarks to the Author):

I co-reviewed this article with [REDACTED]. I agree with all the responses and how the authors addressed our comments. Congratulations.

## Revision 2 - Letter to the Reviewers - NCOMMS-23-52974A

### *Relating sex-bias in human cortical and hippocampal microstructure to sex hormones*

We would like to thank the Editors and Reviewers for their positive evaluations, constructive comments, and for the opportunity to submit a revised manuscript. We feel that the comments and suggestions have greatly improved our work. In this response letter, we outline the steps taken to address the suggestions of the Reviewers in a point-by-point fashion below and highlight the corresponding changes in the manuscript.

#### **Reviewer #1 (Remarks to the Author):**

**The authors have done a great job in revising their manuscript to respond to comments from our initial review. We would support publication of the manuscript in its current form with minor remaining suggested edits as listed below.**

Many thanks for the positive evaluations and helpful suggestions. We have incorporated them all.

**Lines 328-337 in the merged pdf, as there are comparisons for all three metrics (mean, skewness, gradient), please clarify which metric is referred to when the sex difference effect is mentioned.**

Thank you, we have further clarified this in the text. It now reads as follows:

*“Comparing the microstructural gradient of males only to subgroups of females of different estimated hormonal profiles changed the distribution, but not the centre of the distribution of cortex-wide gradient sex differences (all cortex-wide effect size contrasts between any group comparison n.s, **Figure 3B**). However, parcel and cortical wide specific analysis give a more detailed overview of variations by hormonal subgroups (**Figure 3C**; supplementary **Figure 8**). The sex difference effect for the microstructural gradient varied strongest when comparing males to only OC takers versus comparing males to only females estimated to have high progesterone levels: Sex-bias between OC takers and males were least extreme ( $\min d_{OC\ females} = -.4636$ ,  $\max d_{OC\ females} = .3134$ ), while sex differences between males and females in their high progesterone phase showed particularly big positive and negative effect sizes ( $\min d_{high\ prog\ females} = -.5980$ ,  $\max d_{high\ prog\ females} = .3398$ ). In particular, the sex-difference effect for the gradient in the insula is negative between males and OC taking females, but positive or n.s. between males and the different NC female groups. Investigating the female differences more closely, we find that the insula’s microstructural profile covariance is closer with the fugal anchor of the gradient in NC than in in OC females; which seems to be associated with by the low estrogen and low progesterone groups (**Figure 3D**). “*

**Line 372 in the merged pdf, r value should be .13 not 13, right?**

Thanks for spotting, we have corrected this. It now reads accordingly:

*“We further found a significant after controlling for spatial auto-correlation, but small spatial overlap with the sex steroid precursor gene HSD17B3 ( $r = .13$ ,  $p_{spin} < .05$ ).”*

**Lines 386-391, thanks authors for adding this supplemental analysis to quantify the effect of unbalanced male vs. female AHBA donors. The correlations did show a global agreement at least in results of skewness. However, it is worthy of note that male- and female-only results have different signs even in skewness for individual genes like HSD17B8.**

Thanks, we have updated this omission. We now highlight that in particular genes with small correlations such as the one that the Reviewer names (HSD17B8) are sensitive in their correlation effect to sample composition. The section accordingly now reads as follows:

*“Note that the AHBA dataset from which we derived the transcriptomic maps is composed of only one female and five male donors. We thus tested if the results identified here generally trend in the same directions if rerunning the analysis with the female or male donors only (supplementary figure 9). We find that this is the case for the results for profile mean ( $r_{female-all} = 0.4638$ ;  $r_{female-male} = 0.5119$ ) and profile skewness ( $r_{female-all} = 0.7754$ ;  $r_{female-male} = 0.6028$ ), but not for the microstructural gradient ( $r_{female-all} = 0.2$ ;  $r_{female-male} = 0.0603$ ). This analysis demonstrated that small correlations are particularly sensitive to donor sex (supplementary figure 9). Therefore, in this work, we focus on those that presented most reliably independent of the sample composition.”*

**Line 388 in the merged pdf, supplement figure 8 should be 9**

Many thanks, we have corrected this - see above.

**Reviewer #2 (Remarks to the Author):**

**Thank you to the authors for carefully addressing all of our concerns and for the significant effort dedicated to enhancing the paper. We are pleased to acknowledge that all our suggestions and doubts have been effectively addressed. At this stage, we have no further comments and are ready to accept the paper for publication.**

Many thanks for the feedback and appreciation of our work and the constructive revision round!

**Reviewer #3 (Remarks to the Author):**

**I appreciate the authors' revision to this manuscript, which has improved significantly in result. I have responded to each of my initial claims and the authors' rebuttal in order below.**

Many thanks for the positive feedback and the additional comments. We believe that they have been able to further clarify open points and improve our work. We have edited the manuscript according to the comments below.

**1. I am glad to learn that the authors included exclusionary criteria of "recent pregnancy, IUDs, hysterectomy, endometriosis and similar conditions" to control as best as possible for heterogeneity among the sample. Given that hormones are a central theme of the study and these criteria strengthen the validity of its sample, I would suggest stating directly in the manuscript.**

Thank you, this is a very valuable comment. We have now noted this in the respective methods section of the manuscript:

*"We included all females who reported regular menstrual cycles, and that their last menses was between 0 and 28 days ( $n = 284$ ), which is considered the length of a normal menstrual cycle<sup>43</sup>, and excluded those that report recent pregnancy, IUDs, hysterectomy, endometriosis and similar conditions."*

**2. Throughout the manuscript, I would reword "females who have been menstruating in their lives" to "females that report menstruation within 28 days of the scan" as this seems to be a more accurate representation according to the authors' response.**

We agree that this is an important piece of information we should remind the reader of. We have now updated this in our manuscript, e.g.:

Introduction:

*"We then contrasted these microstructural measures between females and males, tested how these sex-differences vary if systematically comparing males with females of particular hormonal profiles (approximated by self-reported menstrual cycle phase at the day of the scan and OC use)"*

Results:

*"We repeated the previous male vs. female contrasts five times, every time considering only those subgroups of females that were characterized by a certain hormonal profile: females who regularly took OC ( $n = 170$ ), females who reported to be around their menstruation at the day of the scan (low estrogen,  $n = 100$ ); females who reported to be around their ovulation (high estrogen,  $n = 184$ ); "*

Discussion:

*“We furthermore demonstrate that there is a particularly big difference in cortical microstructure between females who take OC and NC females who report menstruation within 28 days of the scan, as supported by significant within-females effects.”*

Methods:

*“We included all females who reported regular menstrual cycles within 28 days of the scan, and that their last menses was between 0 and 28 days (n = 284), which is considered the length of a normal menstrual cycle<sup>43</sup>, and excluded those that report recent pregnancy, IUDs, hysterectomy, endometriosis and similar conditions.”*

**3. Thank you for your transparency on the generalization of your OC group and adding a note about this to the limitations.**

Thanks a lot.

**4. The conclusions drawn from this cross-sectional work are more digestible now that the authors have applied their revisions.**

Thank you!

**5. Regarding the following statement within the revised manuscript: "We accordingly built a high estrogen group for females who were broadly around ovulation (between day 7 until day 23, n = 284), and a low estrogen group for females that were just before and during menstruation (n = 100). Progesterone surges after ovulation during the luteal phase, and was thus defined as low before day 15 (n = 171), and high after day 14 (n = 113)" - Does this mean that some females were included in multiple groups? Given the substantial overlap between them by days? I would recommend making independent groupings to avoid this.**

Yes, the Reviewer is correct, females can be included in multiple groups. We chose this grouping as the cyclic progesterone and estrogen peak and dips cannot be split coherently independently from each other in the current framework and dataset. Since our aim was to make this study accessible to an audience wider than experts of the menstrual cycle literature, we deemed a process close to the most well-known hormones to be best in the context of our study. We agree that this grouping comes with both upsides and downsides, which we accounted for when interpreting results. Nevertheless, we believe that it is the most sensible grouping for this dataset and this audience. We furthermore took great care in the text to not overstate the effects within NC females. We stress that the biggest effects can be seen when contrasting NC and OC females and that this part of the study requires future support of direct hormonal measurements, intra-individual comparisons or manipulations. We conclude that in this manuscript, we provide evidence that there can be systematic variations in the sex-bias effect if completely ignoring the cycle phase, but that these effects are not strong enough to show in intra-NC-female comparisons.



We took greater care in explaining the rationale of our grouping in the methods:

*“Lastly, we built groups in which the estimated progesterone and estrogen concentration of NC females differed the strongest according to a normative trajectory of hormonal fluctuations within the menstrual cycle (e.g. Zlotnik et al., 2011). Since estrogen and progesterone concentration peak at different points within the menstrual cycle, we subdivided NC females in a low and high progesterone, and in a low and high estrogen group, respectively. Importantly, since these peaks occur at different points in time, the grouping of estrogen and progesterone partly overlap and are thus not independent of each other. In total, we thus compared five subsamples of females against the cortical microstructure of males: an OC group, a high and low estrogen group, and a high and low progesterone group. We included all females who reported regular menstrual cycles within 28 days of the scan, and that their last menses was between 0 and 28 days (n = 284), which is considered the length of a normal menstrual cycle<sup>43</sup>, and excluded those that report recent pregnancy, IUDs, hysterectomy, endometriosis and similar conditions. Unfortunately, the current sample did not have information about perimenopausal staging or possible endocrine conditions, posing a potential source of noise.*

*Estrogen is low in the beginning of the cycle and starts to rise before ovulation, with a second peak premenstrual in the luteal phase, before it drops again just before and during menstruation (Figure 3 A). We accordingly built a high estrogen group for females who reported they were in the middle of their menstrual cycle (between day 7 until day 23, n = 284), and a low estrogen group for females that were just before and during menstruation (n = 100). Progesterone surges after ovulation during the luteal phase, and was thus defined as low before day 15 (n = 171), and high after day 14 (n = 113). This classification is in accordance with common comparisons between the time window of menstruation with the one around ovulation (high and low estrogen) and luteal vs. follicular phase (high and low progesterone)<sup>48,81,126,127</sup>. While this best accounts for differences in concentration for each of these hormones, progesterone and estrogen groups do overlap due to this classification. ”*

**I am also surprised by the large window for the ovulation/high estrogen group - Two weeks seems too broad. Ovulation typically occurs around day 14, and lasts only a day or two, so the current cutoff is likely grasping other hormonal extremes as well. I appreciate the added analysis by the authors, but think the classification of female subgroups needs reworking, or at least stronger justification.**

Thank you for this comment. We realize that our wording was not very clear. Our aim was not to refer to ovulation, but rather to the two estrogen peaks before and after ovulation. We thus corrected the text to the following:

*“Estrogen is low in the beginning of the cycle and starts to rise before ovulation, with a second peak premenstrual in the luteal phase, before it drops again just before and during menstruation (Figure 3 A). We accordingly built a high estrogen group for females who reported they were in the middle of their menstrual cycle (between day 7 until day 23, n = 284), and a low estrogen group for females that were just before and during menstruation (n = 100). ”*

**Regarding: "to take both male and female hormonal diurnal fluctuations into account" - I would reword this as only males experience noticeable diurnal fluctuations in sex hormones while females fluctuate over the course of 28 days. This sentence makes it sound as though diurnal is in reference to both sexes.**

Thank you for this recommendation. We now reworded the sentence as follows:

*"To provide more robust evidence for a link between gonadal hormones and microstructure, it will be important to follow pioneering macro-scale studies in the future that investigate densely sampled intra-individual hormonal fluctuations as measured by blood-tests, which will measure female hormonal fluctuations more precisely and allow to also take male diurnal hormonal fluctuations into account."*

**6. Thank you for clarifying this detail.**

Happy to clarify.

**7. My initial suggestion was to compare female subgroups within those naturally cycling to support the authors' approach to classifying high/low estrogen and progesterone groups. If differences are found between high estrogen NC and low estrogen NC groups, for instance, this would validate their grouping method and provide more credibility for the hormonal differences between them. I appreciate the comparisons between each NC subgroup and the OC group, though would like to see the former as well.**

Thanks for noting this, we are happy to also provide these contrasts and have now included them in the results and supplementary results. However, there were no significant differences between high and low estrogen; nor between high and low progesterone groups at a FDR threshold. We did, nevertheless, include the non-corrected maps in the supplement for future reference.

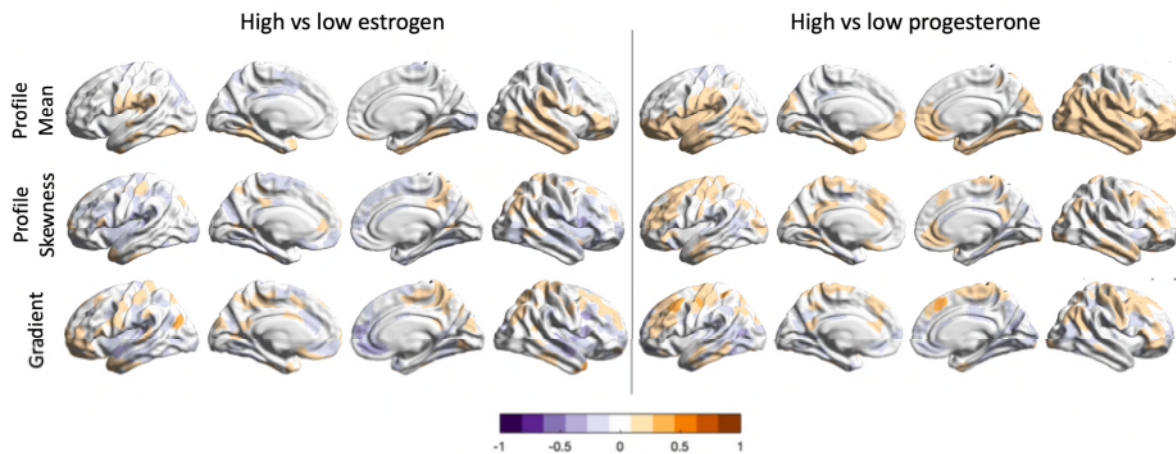

**Supplement 7. Non-significant microstructural differences between NC females.** NC females were divided by hormone estimations according to self-reported days after menstruation. Columns are the three microstructural measures T1w/T2w mean, T1w/T2w skewness, and the microstructural gradient. Purple areas are parcels which had higher values for females in the high estrogen or progesterone group, oranges indicate higher values for NC females in the respective lower hormonal group (all Cohen's *d*). Note that no parcel was significant at an FDR-threshold.

We furthermore made these results more explicit in the text:

#### Results

*“The within-female contrast between for the T1w/T2w profile mean between females in their low vs. high progesterone group and between females in their low vs. high estrogen group was not significant at an FDR-corrected threshold (for not-corrected maps, see **supplementary Figure 7**)*

[...]

*The within-female contrast between for the T1w/T2w profile skewness between females in their low vs. high progesterone group and between females in their low vs. high estrogen group was not significant at an FDR-corrected threshold (for not-corrected maps, see **supplementary Figure 7**).*

[...]

*Within NC-female contrasts for the microstructural gradient were not significant.”*

#### Discussion:

*“We furthermore demonstrate that there is a particularly big difference in cortical microstructure between females who take OC and NC females who report menstruation within 28 days of the scan, as supported by significant within-females effects between these groups. Areas in which we observe these variations largely overlapped with regions that had previously been named as key regions for volumetric menstrual cycle differences (hippocampus, cingulate cortex, insula, inferior parietal lobule, prefrontal*

cortex <sup>47</sup>), or gray matter volume differences due to oral contraceptive use (prefrontal cortex <sup>81</sup> and the cingulate cortex <sup>46</sup>). Importantly, our findings do not extend to significant differences within cycle phases for any microstructural measure. Together, adding to previous observations of the effect of sex hormones on macro-level brain structure, our results demonstrate microstructural variability as a function of exogenous and endogenous sex hormones in females in the long and medium term. “

[...]

“Even though we observed more local variations in the sex-difference effect-size by hormonal subgroup comparison in the collapse microstructural measure, these were not strong enough to show in a within-female comparison after correction for multiple comparisons. We thus conclude that sex differences in average cortical microstructure are at least partly dependent on long-term OC use; but that here, we did not find robust evidence for short-term cycle dependent variations within the female subgroups.”

**8. The authors have added a thought-provoking discussion on the high progesterone vs. males comparison. This improves the impact and interpretation of results.**

Many thanks!

**9. The claims made in the discussion have been appropriately softened to avoid lofty inferences.**

Many thanks!

**Reviewer #4 (Remarks to the Author):**

**I co-reviewed this article with [REDACTED]. I agree with all the responses and how the authors addressed our comments. Congratulations.**

Many thanks for your comments and appreciation of the work.

Reviewer #3 (Remarks to the Author):

I appreciate the authors' rephrasing and clarification efforts in this re-revised manuscript.

Though the classification of cycle phases is not ideal, I accept the authors' response and disclosures added to the methods.

Unfortunately though, the contrasts included in Supplement 7 weaken the authors' approach to these classifications, as I would expect the within-group comparisons for cycle phases among the NC cohort to be significant if accurately representing such distinct phases in which brain dynamics are known to differ. However, the attempt to soften claims regarding comparisons within the NC group, the focus on OC vs NS results, and the added discussion of these supplementary comparisons are sufficient to address this limitation.

I encourage the authors to proofread their manuscript for grammatical errors, as I noticed a few in the quoted text within the reviewer response document.

I thank the authors for their thorough efforts in revising this manuscript and improving its impact. I look forward to seeing it published - Congratulations!
